# Supplementary material for: The Airn lncRNA does not require any DNA elements within its locus to silence distant imprinted genes
Source: PLoS Genet. 2019 Jul 22;15(7):e1008268. doi: 10.1371/journal.pgen.1008268 (PMC6675118; doi:10.1371/journal.pgen.1008268)
Supplement: S5 Table — Real time quantitative PCR (RT-qPCR) raw data and analysis for Fig 2D left panel. (XLSX) [file pgen.1008268.s005.xlsx]

## Sheet: cyclo cDNA
Document Name: 110315_RSDel_E95_VE_cyclo.sds
Plate Type: Absolute Quantification
User: 7000
Document Information
Operator: 7000
Run Date: Wednesday	March 11	2015 10:23:13
Last Modified: Wednesday	March 11	2015 11:46:34
Instrument Type: Applied Biosystems 7000 Real-Time PCR System
Comments:
SDS v1.2
Well	Sample Name	Detector	Task	Ct	StdDev Ct	Qty	Mean Qty	StdDev Qty	Filtered	Tm		Well	Sample Name			Detector	Ct
A1		Cyclo	Unknown	20.51								A1	Thp/+ & +Thp/+	E12.5 VYS (150408)	cDNA (5ul)	Cyclo	20.51		20.7	0.170587	1000	3
A2		Cyclo	Unknown	20.84								A2	Thp/+ & +Thp/+	E12.5 VYS (150408)	cDNA (5ul)	Cyclo	20.84
A3		Cyclo	Unknown	20.75								A3	Thp/+ & +Thp/+	E12.5 VYS (150408)	cDNA (5ul)	Cyclo	20.75
A4		Cyclo	Unknown	23.23								A4	Thp/+ & +Thp/+	E12.5 VYS (150408)	1:4 (5ul)	Cyclo	23.23		23.1433	0.117189	250	2.39794
A5		Cyclo	Unknown	23.19								A5	Thp/+ & +Thp/+	E12.5 VYS (150408)	1:4 (5ul)	Cyclo	23.19
A6		Cyclo	Unknown	23.01								A6	Thp/+ & +Thp/+	E12.5 VYS (150408)	1:4 (5ul)	Cyclo	23.01
A7		Cyclo	Unknown	25.22								A7	Thp/+ & +Thp/+	E12.5 VYS (150408)	1:16 (5ul)	Cyclo	25.22		25.2067	0.051316	62.5	1.79588
A8		Cyclo	Unknown	25.15								A8	Thp/+ & +Thp/+	E12.5 VYS (150408)	1:16 (5ul)	Cyclo	25.15
A9		Cyclo	Unknown	25.25								A9	Thp/+ & +Thp/+	E12.5 VYS (150408)	1:16 (5ul)	Cyclo	25.25
A10		Cyclo	Unknown	27.49								A10	Thp/+ & +Thp/+	E12.5 VYS (150408)	1:64 (5ul)	Cyclo	27.49		27.18	0.545619	15.625	1.19382
A11		Cyclo	Unknown	27.5								A11	Thp/+ & +Thp/+	E12.5 VYS (150408)	1:64 (5ul)	Cyclo	27.5
A12		Cyclo	Unknown	26.55								A12	Thp/+ & +Thp/+	E12.5 VYS (150408)	1:64 (5ul)	Cyclo	26.55
B1		Cyclo	Unknown	24.62								B1	+/+	VE58	cDNA (5ul)	Cyclo	24.62
B2		Cyclo	Unknown	25.34								B2	+/+	VE58	cDNA (5ul)	Cyclo	25.34
B3		Cyclo	Unknown	25.1								B3	+/+	VE58	cDNA (5ul)	Cyclo	25.1
B4		Cyclo	Unknown	24.65								B4	+/+	VE60	cDNA (5ul)	Cyclo	24.65
B5		Cyclo	Unknown	24.55								B5	+/+	VE60	cDNA (5ul)	Cyclo	24.55
B6		Cyclo	Unknown	24.37								B6	+/+	VE60	cDNA (5ul)	Cyclo	24.37
B7		Cyclo	Unknown	25.06								B7	+/+	VE61	cDNA (5ul)	Cyclo	25.06
B8		Cyclo	Unknown	25.51								B8	+/+	VE61	cDNA (5ul)	Cyclo	25.51
B9		Cyclo	Unknown	25.4								B9	+/+	VE61	cDNA (5ul)	Cyclo	25.4
B10		Cyclo	Unknown	24.34								B10	+/+	VE63	cDNA (5ul)	Cyclo	24.34
B11		Cyclo	Unknown	24.65								B11	+/+	VE63	cDNA (5ul)	Cyclo	24.65
B12		Cyclo	Unknown	23.98								B12	+/+	VE63	cDNA (5ul)	Cyclo	23.98
C1		Cyclo	Unknown	23.18								C1	+/+	VE65	cDNA (5ul)	Cyclo	23.18
C2		Cyclo	Unknown	23.79								C2	+/+	VE65	cDNA (5ul)	Cyclo	23.79
C3		Cyclo	Unknown	23.46								C3	+/+	VE65	cDNA (5ul)	Cyclo	23.46
C4		Cyclo	Unknown	24.02								C4	+/+	VE68	cDNA (5ul)	Cyclo	24.02
C5		Cyclo	Unknown	23.8								C5	+/+	VE68	cDNA (5ul)	Cyclo	23.8
C6		Cyclo	Unknown	23.63								C6	+/+	VE68	cDNA (5ul)	Cyclo	23.63
C7		Cyclo	Unknown	25.05								C7	+/+	VE69	cDNA (5ul)	Cyclo	25.05
C8		Cyclo	Unknown	25.23								C8	+/+	VE69	cDNA (5ul)	Cyclo	25.23
C9		Cyclo	Unknown	25.33								C9	+/+	VE69	cDNA (5ul)	Cyclo	25.33
C10		Cyclo	Unknown	23.46								C10	+/+	VE71	cDNA (5ul)	Cyclo	23.46
C11		Cyclo	Unknown	23.61								C11	+/+	VE71	cDNA (5ul)	Cyclo	23.61
C12		Cyclo	Unknown	22.87								C12	+/+	VE71	cDNA (5ul)	Cyclo	22.87
D1		Cyclo	Unknown	23.94								D1	RSDel/+	VE59	cDNA (5ul)	Cyclo	23.94
D2		Cyclo	Unknown	24.19								D2	RSDel/+	VE59	cDNA (5ul)	Cyclo	24.19
D3		Cyclo	Unknown	24.14								D3	RSDel/+	VE59	cDNA (5ul)	Cyclo	24.14
D4		Cyclo	Unknown	24.6								D4	RSDel/+	VE62	cDNA (5ul)	Cyclo	24.6
D5		Cyclo	Unknown	24.28								D5	RSDel/+	VE62	cDNA (5ul)	Cyclo	24.28
D6		Cyclo	Unknown	24.2								D6	RSDel/+	VE62	cDNA (5ul)	Cyclo	24.2
D7		Cyclo	Unknown	24.04								D7	RSDel/+	VE64	cDNA (5ul)	Cyclo	24.04
D8		Cyclo	Unknown	24.58								D8	RSDel/+	VE64	cDNA (5ul)	Cyclo	24.58
D9		Cyclo	Unknown	24.82								D9	RSDel/+	VE64	cDNA (5ul)	Cyclo	24.82
D10		Cyclo	Unknown	24.98								D10	RSDel/+	VE66	cDNA (5ul)	Cyclo	24.98
D11		Cyclo	Unknown	24.9								D11	RSDel/+	VE66	cDNA (5ul)	Cyclo	24.9
D12		Cyclo	Unknown	24.51								D12	RSDel/+	VE66	cDNA (5ul)	Cyclo	24.51
E1		Cyclo	Unknown	23.68								E1	RSDel/+	VE67	cDNA (5ul)	Cyclo	23.68
E2		Cyclo	Unknown	24.26								E2	RSDel/+	VE67	cDNA (5ul)	Cyclo	24.26
E3		Cyclo	Unknown	24.12								E3	RSDel/+	VE67	cDNA (5ul)	Cyclo	24.12
E4		Cyclo	Unknown	28.28								E4	RSDel/+	VE70	cDNA (5ul)	Cyclo	28.28
E5		Cyclo	Unknown	28.09								E5	RSDel/+	VE70	cDNA (5ul)	Cyclo	28.09
E6		Cyclo	Unknown	27.88								E6	RSDel/+	VE70	cDNA (5ul)	Cyclo	27.88
E7		Cyclo	Unknown	26.14								E7	RSDel/+	VE73	cDNA (5ul)	Cyclo	26.14
E8		Cyclo	Unknown	26.34								E8	RSDel/+	VE73	cDNA (5ul)	Cyclo	26.34
E9		Cyclo	Unknown	26.38								E9	RSDel/+	VE73	cDNA (5ul)	Cyclo	26.38
E10		Cyclo	Unknown	24.27								E10	RSDel/+	VE74	cDNA (5ul)	Cyclo	24.27
E11		Cyclo	Unknown	24.49								E11	RSDel/+	VE74	cDNA (5ul)	Cyclo	24.49
E12		Cyclo	Unknown	23.9								E12	RSDel/+	VE74	cDNA (5ul)	Cyclo	23.9
F1		Cyclo	Unknown	25.2								F1	RSDel/+	VE75	cDNA (5ul)	Cyclo	25.2
F2		Cyclo	Unknown	25.99								F2	RSDel/+	VE75	cDNA (5ul)	Cyclo	25.99
F3		Cyclo	Unknown	25.69								F3	RSDel/+	VE75	cDNA (5ul)	Cyclo	25.69
F4		Cyclo	Unknown	24.5								F4	+/+	VE80	cDNA (5ul)	Cyclo	24.5
F5		Cyclo	Unknown	24.23								F5	+/+	VE80	cDNA (5ul)	Cyclo	24.23
F6		Cyclo	Unknown	24.15								F6	+/+	VE80	cDNA (5ul)	Cyclo	24.15
F7		Cyclo	Unknown	23.1								F7	+/+	VE81	cDNA (5ul)	Cyclo	23.1
F8		Cyclo	Unknown	23.21								F8	+/+	VE81	cDNA (5ul)	Cyclo	23.21
F9		Cyclo	Unknown	23.68								F9	+/+	VE81	cDNA (5ul)	Cyclo	23.68
F10		Cyclo	Unknown	23.49								F10	+/+	VE82	cDNA (5ul)	Cyclo	23.49
F11		Cyclo	Unknown	23.78								F11	+/+	VE82	cDNA (5ul)	Cyclo	23.78
F12		Cyclo	Unknown	23.32								F12	+/+	VE82	cDNA (5ul)	Cyclo	23.32
G1		Cyclo	Unknown	25.02								G1	+/+	VE83	cDNA (5ul)	Cyclo	25.02
G2		Cyclo	Unknown	25.99								G2	+/+	VE83	cDNA (5ul)	Cyclo	25.99
G3		Cyclo	Unknown	25.48								G3	+/+	VE83	cDNA (5ul)	Cyclo	25.48
G4		Cyclo	Unknown	23.98								G4	+/+	VE86	cDNA (5ul)	Cyclo	23.98
G5		Cyclo	Unknown	23.63								G5	+/+	VE86	cDNA (5ul)	Cyclo	23.63
G6		Cyclo	Unknown	23.62								G6	+/+	VE86	cDNA (5ul)	Cyclo	23.62
G7		Cyclo	Unknown	27.05								G7	+/+	VE87	cDNA (5ul)	Cyclo	27.05
G8		Cyclo	Unknown	27.37								G8	+/+	VE87	cDNA (5ul)	Cyclo	27.37
G9		Cyclo	Unknown	27.46								G9	+/+	VE87	cDNA (5ul)	Cyclo	27.46
G10		Cyclo	Unknown	24.69								G10	+/RSDel	VE78	cDNA (5ul)	Cyclo	24.69
G11		Cyclo	Unknown	24.95								G11	+/RSDel	VE78	cDNA (5ul)	Cyclo	24.95
G12		Cyclo	Unknown	24.27								G12	+/RSDel	VE78	cDNA (5ul)	Cyclo	24.27
H1		Cyclo	Unknown	26.3								H1	+/RSDel	VE79	cDNA (5ul)	Cyclo	26.3
H2		Cyclo	Unknown	27.58								H2	+/RSDel	VE79	cDNA (5ul)	Cyclo	27.58
H3		Cyclo	Unknown	27.56								H3	+/RSDel	VE79	cDNA (5ul)	Cyclo	27.56
H4		Cyclo	Unknown	24.35								H4	+/RSDel	VE84	cDNA (5ul)	Cyclo	24.35
H5		Cyclo	Unknown	24.15								H5	+/RSDel	VE84	cDNA (5ul)	Cyclo	24.15
H6		Cyclo	Unknown	24.08								H6	+/RSDel	VE84	cDNA (5ul)	Cyclo	24.08
H7		Cyclo	Unknown	31.08								H7	+/RSDel	VE85	cDNA (5ul)	Cyclo	31.08
H8		Cyclo	Unknown	31.12								H8	+/RSDel	VE85	cDNA (5ul)	Cyclo	31.12
H9		Cyclo	Unknown	31.46								H9	+/RSDel	VE85	cDNA (5ul)	Cyclo	31.46
H10		Cyclo	Unknown	23.64								H10	+/RSDel	VE88	cDNA (5ul)	Cyclo	23.64
H11		Cyclo	Unknown	23.81								H11	+/RSDel	VE88	cDNA (5ul)	Cyclo	23.81
H12		Cyclo	Unknown	22.58								H12	+/RSDel	VE88	cDNA (5ul)	Cyclo	22.58

## Sheet: cyclo RT-
Document Name: 110315_RSDel_E95_VE_cyclo_RT-.sds
Plate Type: Absolute Quantification
User: 7000
Document Information
Operator: 7000
Run Date: Wednesday	March 11	2015 12:15:23
Last Modified: Wednesday	March 11	2015 13:38:43
Instrument Type: Applied Biosystems 7000 Real-Time PCR System
Comments:
SDS v1.2
Well	Sample Name	Detector	Task	Ct	StdDev Ct	Qty	Mean Qty	StdDev Qty	Filtered	Tm		Well	Sample Name			Detector	Ct
A1		Cyclo	Unknown	20.15								A1	Thp/+ & +Thp/+	E12.5 VYS (150408)	cDNA (5ul)	Cyclo	20.15		20.15	0.247487	1000	3
A2		Cyclo	Unknown	20.5								A2	Thp/+ & +Thp/+	E12.5 VYS (150408)	cDNA (5ul)	Cyclo	20.5
A3		Cyclo	Unknown	22.76								A3	Thp/+ & +Thp/+	E12.5 VYS (150408)	1:4 (5ul)	Cyclo	22.76		22.76	0.0707107	250	2.39794
A4		Cyclo	Unknown	22.86								A4	Thp/+ & +Thp/+	E12.5 VYS (150408)	1:4 (5ul)	Cyclo	22.86
A5		Cyclo	Unknown	25.04								A5	Thp/+ & +Thp/+	E12.5 VYS (150408)	1:16 (5ul)	Cyclo	25.04		25.04	0.0777817	62.5	1.79588
A6		Cyclo	Unknown	24.93								A6	Thp/+ & +Thp/+	E12.5 VYS (150408)	1:16 (5ul)	Cyclo	24.93
A7		Cyclo	Unknown	26.93								A7	Thp/+ & +Thp/+	E12.5 VYS (150408)	1:64 (5ul)	Cyclo	26.93		26.93	0.0777817	15.625	1.19382
A8		Cyclo	Unknown	27.04								A8	Thp/+ & +Thp/+	E12.5 VYS (150408)	1:64 (5ul)	Cyclo	27.04
B1		Cyclo	Unknown	Undetermined								B1	+/+	VE58	cDNA (5ul)	Cyclo	40
B2		Cyclo	Unknown	Undetermined								B2	+/+	VE58	cDNA (5ul)	Cyclo	40
B3		Cyclo	Unknown	Undetermined								B3	+/+	VE58	cDNA (5ul)	Cyclo	40
B4		Cyclo	Unknown	36.4								B4	+/+	VE60	cDNA (5ul)	Cyclo	36.4
B5		Cyclo	Unknown	36.43								B5	+/+	VE60	cDNA (5ul)	Cyclo	36.43
B6		Cyclo	Unknown	36.25								B6	+/+	VE60	cDNA (5ul)	Cyclo	36.25
B7		Cyclo	Unknown	Undetermined								B7	+/+	VE61	cDNA (5ul)	Cyclo	40
B8		Cyclo	Unknown	38.43								B8	+/+	VE61	cDNA (5ul)	Cyclo	38.43
B9		Cyclo	Unknown	38.69								B9	+/+	VE61	cDNA (5ul)	Cyclo	38.69
B10		Cyclo	Unknown	Undetermined								B10	+/+	VE63	cDNA (5ul)	Cyclo	40
B11		Cyclo	Unknown	39.53								B11	+/+	VE63	cDNA (5ul)	Cyclo	39.53
B12		Cyclo	Unknown	38.69								B12	+/+	VE63	cDNA (5ul)	Cyclo	38.69
C1		Cyclo	Unknown	35.27								C1	+/+	VE65	cDNA (5ul)	Cyclo	35.27
C2		Cyclo	Unknown	35.3								C2	+/+	VE65	cDNA (5ul)	Cyclo	35.3
C3		Cyclo	Unknown	35.38								C3	+/+	VE65	cDNA (5ul)	Cyclo	35.38
C4		Cyclo	Unknown	37.63								C4	+/+	VE68	cDNA (5ul)	Cyclo	37.63
C5		Cyclo	Unknown	37.32								C5	+/+	VE68	cDNA (5ul)	Cyclo	37.32
C6		Cyclo	Unknown	37.09								C6	+/+	VE68	cDNA (5ul)	Cyclo	37.09
C7		Cyclo	Unknown	39.9								C7	+/+	VE69	cDNA (5ul)	Cyclo	39.9
C8		Cyclo	Unknown	Undetermined								C8	+/+	VE69	cDNA (5ul)	Cyclo	40
C9		Cyclo	Unknown	Undetermined								C9	+/+	VE69	cDNA (5ul)	Cyclo	40
C10		Cyclo	Unknown	38.21								C10	+/+	VE71	cDNA (5ul)	Cyclo	38.21
C11		Cyclo	Unknown	38.64								C11	+/+	VE71	cDNA (5ul)	Cyclo	38.64
C12		Cyclo	Unknown	37.51								C12	+/+	VE71	cDNA (5ul)	Cyclo	37.51
D1		Cyclo	Unknown	Undetermined								D1	RSDel/+	VE59	cDNA (5ul)	Cyclo	40
D2		Cyclo	Unknown	Undetermined								D2	RSDel/+	VE59	cDNA (5ul)	Cyclo	40
D3		Cyclo	Unknown	Undetermined								D3	RSDel/+	VE59	cDNA (5ul)	Cyclo	40
D4		Cyclo	Unknown	35.88								D4	RSDel/+	VE62	cDNA (5ul)	Cyclo	35.88
D5		Cyclo	Unknown	35.76								D5	RSDel/+	VE62	cDNA (5ul)	Cyclo	35.76
D6		Cyclo	Unknown	36.1								D6	RSDel/+	VE62	cDNA (5ul)	Cyclo	36.1
D7		Cyclo	Unknown	39.6								D7	RSDel/+	VE64	cDNA (5ul)	Cyclo	39.6
D8		Cyclo	Unknown	39.18								D8	RSDel/+	VE64	cDNA (5ul)	Cyclo	39.18
D9		Cyclo	Unknown	Undetermined								D9	RSDel/+	VE64	cDNA (5ul)	Cyclo	40
D10		Cyclo	Unknown	36.98								D10	RSDel/+	VE66	cDNA (5ul)	Cyclo	36.98
D11		Cyclo	Unknown	36.69								D11	RSDel/+	VE66	cDNA (5ul)	Cyclo	36.69
D12		Cyclo	Unknown	36.58								D12	RSDel/+	VE66	cDNA (5ul)	Cyclo	36.58
E1		Cyclo	Unknown	33.34								E1	RSDel/+	VE67	cDNA (5ul)	Cyclo	33.34
E2		Cyclo	Unknown	33.08								E2	RSDel/+	VE67	cDNA (5ul)	Cyclo	33.08
E3		Cyclo	Unknown	33.29								E3	RSDel/+	VE67	cDNA (5ul)	Cyclo	33.29
E4		Cyclo	Unknown	Undetermined								E4	RSDel/+	VE70	cDNA (5ul)	Cyclo	40
E5		Cyclo	Unknown	Undetermined								E5	RSDel/+	VE70	cDNA (5ul)	Cyclo	40
E6		Cyclo	Unknown	Undetermined								E6	RSDel/+	VE70	cDNA (5ul)	Cyclo	40
E7		Cyclo	Unknown	Undetermined								E7	RSDel/+	VE73	cDNA (5ul)	Cyclo	40
E8		Cyclo	Unknown	Undetermined								E8	RSDel/+	VE73	cDNA (5ul)	Cyclo	40
E9		Cyclo	Unknown	Undetermined								E9	RSDel/+	VE73	cDNA (5ul)	Cyclo	40
E10		Cyclo	Unknown	36.54								E10	RSDel/+	VE74	cDNA (5ul)	Cyclo	36.54
E11		Cyclo	Unknown	36.47								E11	RSDel/+	VE74	cDNA (5ul)	Cyclo	36.47
E12		Cyclo	Unknown	36.12								E12	RSDel/+	VE74	cDNA (5ul)	Cyclo	36.12
F1		Cyclo	Unknown	Undetermined								F1	RSDel/+	VE75	cDNA (5ul)	Cyclo	40
F2		Cyclo	Unknown	39.68								F2	RSDel/+	VE75	cDNA (5ul)	Cyclo	39.68
F3		Cyclo	Unknown	Undetermined								F3	RSDel/+	VE75	cDNA (5ul)	Cyclo	40
F4		Cyclo	Unknown	37.12								F4	+/+	VE80	cDNA (5ul)	Cyclo	37.12
F5		Cyclo	Unknown	37.24								F5	+/+	VE80	cDNA (5ul)	Cyclo	37.24
F6		Cyclo	Unknown	37.65								F6	+/+	VE80	cDNA (5ul)	Cyclo	37.65
F7		Cyclo	Unknown	32.72								F7	+/+	VE81	cDNA (5ul)	Cyclo	32.72
F8		Cyclo	Unknown	33.01								F8	+/+	VE81	cDNA (5ul)	Cyclo	33.01
F9		Cyclo	Unknown	33.15								F9	+/+	VE81	cDNA (5ul)	Cyclo	33.15
F10		Cyclo	Unknown	36.09								F10	+/+	VE82	cDNA (5ul)	Cyclo	36.09
F11		Cyclo	Unknown	37.02								F11	+/+	VE82	cDNA (5ul)	Cyclo	37.02
F12		Cyclo	Unknown	36.39								F12	+/+	VE82	cDNA (5ul)	Cyclo	36.39
G1		Cyclo	Unknown	37.84								G1	+/+	VE83	cDNA (5ul)	Cyclo	37.84
G2		Cyclo	Unknown	37.55								G2	+/+	VE83	cDNA (5ul)	Cyclo	37.55
G3		Cyclo	Unknown	37.62								G3	+/+	VE83	cDNA (5ul)	Cyclo	37.62
G4		Cyclo	Unknown	34.95								G4	+/+	VE86	cDNA (5ul)	Cyclo	34.95
G5		Cyclo	Unknown	34.55								G5	+/+	VE86	cDNA (5ul)	Cyclo	34.55
G6		Cyclo	Unknown	34.96								G6	+/+	VE86	cDNA (5ul)	Cyclo	34.96
G7		Cyclo	Unknown	36.89								G7	+/+	VE87	cDNA (5ul)	Cyclo	36.89
G8		Cyclo	Unknown	37.67								G8	+/+	VE87	cDNA (5ul)	Cyclo	37.67
G9		Cyclo	Unknown	37.05								G9	+/+	VE87	cDNA (5ul)	Cyclo	37.05
G10		Cyclo	Unknown	Undetermined								G10	+/RSDel	VE78	cDNA (5ul)	Cyclo	40
G11		Cyclo	Unknown	Undetermined								G11	+/RSDel	VE78	cDNA (5ul)	Cyclo	40
G12		Cyclo	Unknown	Undetermined								G12	+/RSDel	VE78	cDNA (5ul)	Cyclo	40
H1		Cyclo	Unknown	Undetermined								H1	+/RSDel	VE79	cDNA (5ul)	Cyclo	40
H2		Cyclo	Unknown	Undetermined								H2	+/RSDel	VE79	cDNA (5ul)	Cyclo	40
H3		Cyclo	Unknown	Undetermined								H3	+/RSDel	VE79	cDNA (5ul)	Cyclo	40
H4		Cyclo	Unknown	31.23								H4	+/RSDel	VE84	cDNA (5ul)	Cyclo	31.23
H5		Cyclo	Unknown	31.29								H5	+/RSDel	VE84	cDNA (5ul)	Cyclo	31.29
H6		Cyclo	Unknown	31.14								H6	+/RSDel	VE84	cDNA (5ul)	Cyclo	31.14
H7		Cyclo	Unknown	Undetermined								H7	+/RSDel	VE85	cDNA (5ul)	Cyclo	40
H8		Cyclo	Unknown	Undetermined								H8	+/RSDel	VE85	cDNA (5ul)	Cyclo	40
H9		Cyclo	Unknown	Undetermined								H9	+/RSDel	VE85	cDNA (5ul)	Cyclo	40
H10		Cyclo	Unknown	38.59								H10	+/RSDel	VE88	cDNA (5ul)	Cyclo	38.59
H11		Cyclo	Unknown	Undetermined								H11	+/RSDel	VE88	cDNA (5ul)	Cyclo	40
H12		Cyclo	Unknown	Undetermined								H12	+/RSDel	VE88	cDNA (5ul)	Cyclo	40

## Sheet: Slc22a3 cDNA
Document Name: 120315_RSDel_E95_VE_Slc22a3_cDNA.sds
Plate Type: Absolute Quantification
User: 7000
Document Information
Operator: 7000
Run Date: Thursday	March 12	2015 13:01:15
Last Modified: Thursday	March 12	2015 14:24:36
Instrument Type: Applied Biosystems 7000 Real-Time PCR System
Comments:
SDS v1.2
Well	Sample Name	Detector	Task	Ct	StdDev Ct	Qty	Mean Qty	StdDev Qty	Filtered	Tm		Well	Sample Name			Detector	Ct
A1		Slc22a3	Unknown	29.86								A1	Thp/+ & +Thp/+	E12.5 VYS (150408)	cDNA (5ul)	Slc22a3	29.86		29.7267	0.166533	1000	3
A2		Slc22a3	Unknown	29.78								A2	Thp/+ & +Thp/+	E12.5 VYS (150408)	cDNA (5ul)	Slc22a3	29.78
A3		Slc22a3	Unknown	29.54								A3	Thp/+ & +Thp/+	E12.5 VYS (150408)	cDNA (5ul)	Slc22a3	29.54
A4		Slc22a3	Unknown	31.3								A4	Thp/+ & +Thp/+	E12.5 VYS (150408)	1:4 (5ul)	Slc22a3	31.3		31.3667	0.0907377	250	2.39794
A5		Slc22a3	Unknown	31.33								A5	Thp/+ & +Thp/+	E12.5 VYS (150408)	1:4 (5ul)	Slc22a3	31.33
A6		Slc22a3	Unknown	31.47								A6	Thp/+ & +Thp/+	E12.5 VYS (150408)	1:4 (5ul)	Slc22a3	31.47
A7		Slc22a3	Unknown	33.3								A7	Thp/+ & +Thp/+	E12.5 VYS (150408)	1:16 (5ul)	Slc22a3	33.3		33.31	0.0556776	62.5	1.79588
A8		Slc22a3	Unknown	33.26								A8	Thp/+ & +Thp/+	E12.5 VYS (150408)	1:16 (5ul)	Slc22a3	33.26
A9		Slc22a3	Unknown	33.37								A9	Thp/+ & +Thp/+	E12.5 VYS (150408)	1:16 (5ul)	Slc22a3	33.37
A10		Slc22a3	Unknown	34.96								A10	Thp/+ & +Thp/+	E12.5 VYS (150408)	1:64 (5ul)	Slc22a3	34.96		35.36	0.492443	15.625	1.19382
A11		Slc22a3	Unknown	35.21								A11	Thp/+ & +Thp/+	E12.5 VYS (150408)	1:64 (5ul)	Slc22a3	35.21
A12		Slc22a3	Unknown	35.91								A12	Thp/+ & +Thp/+	E12.5 VYS (150408)	1:64 (5ul)	Slc22a3	35.91
B1		Slc22a3	Unknown	31.42								B1	+/+	VE58	cDNA (5ul)	Slc22a3	31.42
B2		Slc22a3	Unknown	31.75								B2	+/+	VE58	cDNA (5ul)	Slc22a3	31.75
B3		Slc22a3	Unknown	31.27								B3	+/+	VE58	cDNA (5ul)	Slc22a3	31.27
B4		Slc22a3	Unknown	31.26								B4	+/+	VE60	cDNA (5ul)	Slc22a3	31.26
B5		Slc22a3	Unknown	30.76								B5	+/+	VE60	cDNA (5ul)	Slc22a3	30.76
B6		Slc22a3	Unknown	30.63								B6	+/+	VE60	cDNA (5ul)	Slc22a3	30.63
B7		Slc22a3	Unknown	30.97								B7	+/+	VE61	cDNA (5ul)	Slc22a3	30.97
B8		Slc22a3	Unknown	31.03								B8	+/+	VE61	cDNA (5ul)	Slc22a3	31.03
B9		Slc22a3	Unknown	31.06								B9	+/+	VE61	cDNA (5ul)	Slc22a3	31.06
B10		Slc22a3	Unknown	30.01								B10	+/+	VE63	cDNA (5ul)	Slc22a3	30.01
B11		Slc22a3	Unknown	30.32								B11	+/+	VE63	cDNA (5ul)	Slc22a3	30.32
B12		Slc22a3	Unknown	30.08								B12	+/+	VE63	cDNA (5ul)	Slc22a3	30.08
C1		Slc22a3	Unknown	29.01								C1	+/+	VE65	cDNA (5ul)	Slc22a3	29.01
C2		Slc22a3	Unknown	28.78								C2	+/+	VE65	cDNA (5ul)	Slc22a3	28.78
C3		Slc22a3	Unknown	28.85								C3	+/+	VE65	cDNA (5ul)	Slc22a3	28.85
C4		Slc22a3	Unknown	29.15								C4	+/+	VE68	cDNA (5ul)	Slc22a3	29.15
C5		Slc22a3	Unknown	29.29								C5	+/+	VE68	cDNA (5ul)	Slc22a3	29.29
C6		Slc22a3	Unknown	29.08								C6	+/+	VE68	cDNA (5ul)	Slc22a3	29.08
C7		Slc22a3	Unknown	30.78								C7	+/+	VE69	cDNA (5ul)	Slc22a3	30.78
C8		Slc22a3	Unknown	30.7								C8	+/+	VE69	cDNA (5ul)	Slc22a3	30.7
C9		Slc22a3	Unknown	30.7								C9	+/+	VE69	cDNA (5ul)	Slc22a3	30.7
C10		Slc22a3	Unknown	28.33								C10	+/+	VE71	cDNA (5ul)	Slc22a3	28.33
C11		Slc22a3	Unknown	28.49								C11	+/+	VE71	cDNA (5ul)	Slc22a3	28.49
C12		Slc22a3	Unknown	28.36								C12	+/+	VE71	cDNA (5ul)	Slc22a3	28.36
D1		Slc22a3	Unknown	30.2								D1	RSDel/+	VE59	cDNA (5ul)	Slc22a3	30.2
D2		Slc22a3	Unknown	30.22								D2	RSDel/+	VE59	cDNA (5ul)	Slc22a3	30.22
D3		Slc22a3	Unknown	30.28								D3	RSDel/+	VE59	cDNA (5ul)	Slc22a3	30.28
D4		Slc22a3	Unknown	30.75								D4	RSDel/+	VE62	cDNA (5ul)	Slc22a3	30.75
D5		Slc22a3	Unknown	30.98								D5	RSDel/+	VE62	cDNA (5ul)	Slc22a3	30.98
D6		Slc22a3	Unknown	30.76								D6	RSDel/+	VE62	cDNA (5ul)	Slc22a3	30.76
D7		Slc22a3	Unknown	30.58								D7	RSDel/+	VE64	cDNA (5ul)	Slc22a3	30.58
D8		Slc22a3	Unknown	30.22								D8	RSDel/+	VE64	cDNA (5ul)	Slc22a3	30.22
D9		Slc22a3	Unknown	30.3								D9	RSDel/+	VE64	cDNA (5ul)	Slc22a3	30.3
D10		Slc22a3	Unknown	29.95								D10	RSDel/+	VE66	cDNA (5ul)	Slc22a3	29.95
D11		Slc22a3	Unknown	30.14								D11	RSDel/+	VE66	cDNA (5ul)	Slc22a3	30.14
D12		Slc22a3	Unknown	30								D12	RSDel/+	VE66	cDNA (5ul)	Slc22a3	30
E1		Slc22a3	Unknown	30.66								E1	RSDel/+	VE67	cDNA (5ul)	Slc22a3	30.66
E2		Slc22a3	Unknown	30.41								E2	RSDel/+	VE67	cDNA (5ul)	Slc22a3	30.41
E3		Slc22a3	Unknown	30.27								E3	RSDel/+	VE67	cDNA (5ul)	Slc22a3	30.27
E4		Slc22a3	Unknown	33.93								E4	RSDel/+	VE70	cDNA (5ul)	Slc22a3	33.93
E5		Slc22a3	Unknown	33.42								E5	RSDel/+	VE70	cDNA (5ul)	Slc22a3	33.42
E6		Slc22a3	Unknown	33.84								E6	RSDel/+	VE70	cDNA (5ul)	Slc22a3	33.84
E7		Slc22a3	Unknown	32.22								E7	RSDel/+	VE73	cDNA (5ul)	Slc22a3	32.22
E8		Slc22a3	Unknown	31.92								E8	RSDel/+	VE73	cDNA (5ul)	Slc22a3	31.92
E9		Slc22a3	Unknown	32.1								E9	RSDel/+	VE73	cDNA (5ul)	Slc22a3	32.1
E10		Slc22a3	Unknown	30.17								E10	RSDel/+	VE74	cDNA (5ul)	Slc22a3	30.17
E11		Slc22a3	Unknown	30.2								E11	RSDel/+	VE74	cDNA (5ul)	Slc22a3	30.2
E12		Slc22a3	Unknown	30								E12	RSDel/+	VE74	cDNA (5ul)	Slc22a3	30
F1		Slc22a3	Unknown	31.43								F1	RSDel/+	VE75	cDNA (5ul)	Slc22a3	31.43
F2		Slc22a3	Unknown	31.72								F2	RSDel/+	VE75	cDNA (5ul)	Slc22a3	31.72
F3		Slc22a3	Unknown	31.49								F3	RSDel/+	VE75	cDNA (5ul)	Slc22a3	31.49
F4		Slc22a3	Unknown	30.14								F4	+/+	VE80	cDNA (5ul)	Slc22a3	30.14
F5		Slc22a3	Unknown	30.1								F5	+/+	VE80	cDNA (5ul)	Slc22a3	30.1
F6		Slc22a3	Unknown	30.02								F6	+/+	VE80	cDNA (5ul)	Slc22a3	30.02
F7		Slc22a3	Unknown	28.55								F7	+/+	VE81	cDNA (5ul)	Slc22a3	28.55
F8		Slc22a3	Unknown	28.46								F8	+/+	VE81	cDNA (5ul)	Slc22a3	28.46
F9		Slc22a3	Unknown	28.6								F9	+/+	VE81	cDNA (5ul)	Slc22a3	28.6
F10		Slc22a3	Unknown	28.79								F10	+/+	VE82	cDNA (5ul)	Slc22a3	28.79
F11		Slc22a3	Unknown	28.93								F11	+/+	VE82	cDNA (5ul)	Slc22a3	28.93
F12		Slc22a3	Unknown	28.83								F12	+/+	VE82	cDNA (5ul)	Slc22a3	28.83
G1		Slc22a3	Unknown	31.23								G1	+/+	VE83	cDNA (5ul)	Slc22a3	31.23
G2		Slc22a3	Unknown	31.19								G2	+/+	VE83	cDNA (5ul)	Slc22a3	31.19
G3		Slc22a3	Unknown	31.03								G3	+/+	VE83	cDNA (5ul)	Slc22a3	31.03
G4		Slc22a3	Unknown	28.9								G4	+/+	VE86	cDNA (5ul)	Slc22a3	28.9
G5		Slc22a3	Unknown	28.83								G5	+/+	VE86	cDNA (5ul)	Slc22a3	28.83
G6		Slc22a3	Unknown	28.92								G6	+/+	VE86	cDNA (5ul)	Slc22a3	28.92
G7		Slc22a3	Unknown	32.36								G7	+/+	VE87	cDNA (5ul)	Slc22a3	32.36
G8		Slc22a3	Unknown	32.2								G8	+/+	VE87	cDNA (5ul)	Slc22a3	32.2
G9		Slc22a3	Unknown	32.31								G9	+/+	VE87	cDNA (5ul)	Slc22a3	32.31
G10		Slc22a3	Unknown	29.14								G10	+/RSDel	VE78	cDNA (5ul)	Slc22a3	29.14
G11		Slc22a3	Unknown	29.25								G11	+/RSDel	VE78	cDNA (5ul)	Slc22a3	29.25
G12		Slc22a3	Unknown	29.23								G12	+/RSDel	VE78	cDNA (5ul)	Slc22a3	29.23
H1		Slc22a3	Unknown	32.58								H1	+/RSDel	VE79	cDNA (5ul)	Slc22a3	32.58
H2		Slc22a3	Unknown	32.71								H2	+/RSDel	VE79	cDNA (5ul)	Slc22a3	32.71
H3		Slc22a3	Unknown	32.63								H3	+/RSDel	VE79	cDNA (5ul)	Slc22a3	32.63
H4		Slc22a3	Unknown	28.56								H4	+/RSDel	VE84	cDNA (5ul)	Slc22a3	28.56
H5		Slc22a3	Unknown	28.46								H5	+/RSDel	VE84	cDNA (5ul)	Slc22a3	28.46
H6		Slc22a3	Unknown	28.46								H6	+/RSDel	VE84	cDNA (5ul)	Slc22a3	28.46
H7		Slc22a3	Unknown	35.16								H7	+/RSDel	VE85	cDNA (5ul)	Slc22a3	35.16
H8		Slc22a3	Unknown	35.37								H8	+/RSDel	VE85	cDNA (5ul)	Slc22a3	35.37
H9		Slc22a3	Unknown	34.57								H9	+/RSDel	VE85	cDNA (5ul)	Slc22a3	34.57
H10		Slc22a3	Unknown	27.93								H10	+/RSDel	VE88	cDNA (5ul)	Slc22a3	27.93
H11		Slc22a3	Unknown	28.13								H11	+/RSDel	VE88	cDNA (5ul)	Slc22a3	28.13
H12		Slc22a3	Unknown	28.13								H12	+/RSDel	VE88	cDNA (5ul)	Slc22a3	28.13

## Sheet: Slc22a3 RT-
Document Name: 120315_RSDel_E95_VE_Slc22a3_RT-.sds
Plate Type: Absolute Quantification
User: 7000
Document Information
Operator: 7000
Run Date: Thursday	March 12	2015 14:43:12
Last Modified: Thursday	March 12	2015 16:06:32
Instrument Type: Applied Biosystems 7000 Real-Time PCR System
Comments:
SDS v1.2
Well	Sample Name	Detector	Task	Ct	StdDev Ct	Qty	Mean Qty	StdDev Qty	Filtered	Tm		Well	Sample Name			Detector	Ct
A1		Slc22a3	Unknown	28.97								A1	Thp/+ & +Thp/+	E12.5 VYS (150408)	cDNA (5ul)	Slc22a3	28.97		28.96	0.08544	1000	3
A2		Slc22a3	Unknown	29.04								A2	Thp/+ & +Thp/+	E12.5 VYS (150408)	cDNA (5ul)	Slc22a3	29.04
A3		Slc22a3	Unknown	28.87								A3	Thp/+ & +Thp/+	E12.5 VYS (150408)	cDNA (5ul)	Slc22a3	28.87
A4		Slc22a3	Unknown	30.81								A4	Thp/+ & +Thp/+	E12.5 VYS (150408)	1:4 (5ul)	Slc22a3	30.81		30.9633	0.166233	250	2.39794
A5		Slc22a3	Unknown	31.14								A5	Thp/+ & +Thp/+	E12.5 VYS (150408)	1:4 (5ul)	Slc22a3	31.14
A6		Slc22a3	Unknown	30.94								A6	Thp/+ & +Thp/+	E12.5 VYS (150408)	1:4 (5ul)	Slc22a3	30.94
A7		Slc22a3	Unknown	32.84								A7	Thp/+ & +Thp/+	E12.5 VYS (150408)	1:16 (5ul)	Slc22a3	32.84		32.7367	0.123423	62.5	1.79588
A8		Slc22a3	Unknown	32.77								A8	Thp/+ & +Thp/+	E12.5 VYS (150408)	1:16 (5ul)	Slc22a3	32.77
A9		Slc22a3	Unknown	32.6								A9	Thp/+ & +Thp/+	E12.5 VYS (150408)	1:16 (5ul)	Slc22a3	32.6
A10		Slc22a3	Unknown	34.74								A10	Thp/+ & +Thp/+	E12.5 VYS (150408)	1:64 (5ul)	Slc22a3	34.74		34.8933	0.231805	15.625	1.19382
A11		Slc22a3	Unknown	34.78								A11	Thp/+ & +Thp/+	E12.5 VYS (150408)	1:64 (5ul)	Slc22a3	34.78
A12		Slc22a3	Unknown	35.16								A12	Thp/+ & +Thp/+	E12.5 VYS (150408)	1:64 (5ul)	Slc22a3	35.16
B1		Slc22a3	Unknown	Undetermined								B1	+/+	VE58	cDNA (5ul)	Slc22a3	40
B2		Slc22a3	Unknown	Undetermined								B2	+/+	VE58	cDNA (5ul)	Slc22a3	40
B3		Slc22a3	Unknown	Undetermined								B3	+/+	VE58	cDNA (5ul)	Slc22a3	40
B4		Slc22a3	Unknown	Undetermined								B4	+/+	VE60	cDNA (5ul)	Slc22a3	40
B5		Slc22a3	Unknown	Undetermined								B5	+/+	VE60	cDNA (5ul)	Slc22a3	40
B6		Slc22a3	Unknown	Undetermined								B6	+/+	VE60	cDNA (5ul)	Slc22a3	40
B7		Slc22a3	Unknown	Undetermined								B7	+/+	VE61	cDNA (5ul)	Slc22a3	40
B8		Slc22a3	Unknown	Undetermined								B8	+/+	VE61	cDNA (5ul)	Slc22a3	40
B9		Slc22a3	Unknown	Undetermined								B9	+/+	VE61	cDNA (5ul)	Slc22a3	40
B10		Slc22a3	Unknown	Undetermined								B10	+/+	VE63	cDNA (5ul)	Slc22a3	40
B11		Slc22a3	Unknown	Undetermined								B11	+/+	VE63	cDNA (5ul)	Slc22a3	40
B12		Slc22a3	Unknown	Undetermined								B12	+/+	VE63	cDNA (5ul)	Slc22a3	40
C1		Slc22a3	Unknown	Undetermined								C1	+/+	VE65	cDNA (5ul)	Slc22a3	40
C2		Slc22a3	Unknown	Undetermined								C2	+/+	VE65	cDNA (5ul)	Slc22a3	40
C3		Slc22a3	Unknown	Undetermined								C3	+/+	VE65	cDNA (5ul)	Slc22a3	40
C4		Slc22a3	Unknown	Undetermined								C4	+/+	VE68	cDNA (5ul)	Slc22a3	40
C5		Slc22a3	Unknown	Undetermined								C5	+/+	VE68	cDNA (5ul)	Slc22a3	40
C6		Slc22a3	Unknown	Undetermined								C6	+/+	VE68	cDNA (5ul)	Slc22a3	40
C7		Slc22a3	Unknown	Undetermined								C7	+/+	VE69	cDNA (5ul)	Slc22a3	40
C8		Slc22a3	Unknown	Undetermined								C8	+/+	VE69	cDNA (5ul)	Slc22a3	40
C9		Slc22a3	Unknown	Undetermined								C9	+/+	VE69	cDNA (5ul)	Slc22a3	40
C10		Slc22a3	Unknown	Undetermined								C10	+/+	VE71	cDNA (5ul)	Slc22a3	40
C11		Slc22a3	Unknown	Undetermined								C11	+/+	VE71	cDNA (5ul)	Slc22a3	40
C12		Slc22a3	Unknown	Undetermined								C12	+/+	VE71	cDNA (5ul)	Slc22a3	40
D1		Slc22a3	Unknown	Undetermined								D1	RSDel/+	VE59	cDNA (5ul)	Slc22a3	40
D2		Slc22a3	Unknown	Undetermined								D2	RSDel/+	VE59	cDNA (5ul)	Slc22a3	40
D3		Slc22a3	Unknown	Undetermined								D3	RSDel/+	VE59	cDNA (5ul)	Slc22a3	40
D4		Slc22a3	Unknown	Undetermined								D4	RSDel/+	VE62	cDNA (5ul)	Slc22a3	40
D5		Slc22a3	Unknown	Undetermined								D5	RSDel/+	VE62	cDNA (5ul)	Slc22a3	40
D6		Slc22a3	Unknown	Undetermined								D6	RSDel/+	VE62	cDNA (5ul)	Slc22a3	40
D7		Slc22a3	Unknown	Undetermined								D7	RSDel/+	VE64	cDNA (5ul)	Slc22a3	40
D8		Slc22a3	Unknown	Undetermined								D8	RSDel/+	VE64	cDNA (5ul)	Slc22a3	40
D9		Slc22a3	Unknown	Undetermined								D9	RSDel/+	VE64	cDNA (5ul)	Slc22a3	40
D10		Slc22a3	Unknown	Undetermined								D10	RSDel/+	VE66	cDNA (5ul)	Slc22a3	40
D11		Slc22a3	Unknown	Undetermined								D11	RSDel/+	VE66	cDNA (5ul)	Slc22a3	40
D12		Slc22a3	Unknown	Undetermined								D12	RSDel/+	VE66	cDNA (5ul)	Slc22a3	40
E1		Slc22a3	Unknown	38.97								E1	RSDel/+	VE67	cDNA (5ul)	Slc22a3	38.97
E2		Slc22a3	Unknown	Undetermined								E2	RSDel/+	VE67	cDNA (5ul)	Slc22a3	40
E3		Slc22a3	Unknown	38.06								E3	RSDel/+	VE67	cDNA (5ul)	Slc22a3	38.06
E4		Slc22a3	Unknown	Undetermined								E4	RSDel/+	VE70	cDNA (5ul)	Slc22a3	40
E5		Slc22a3	Unknown	Undetermined								E5	RSDel/+	VE70	cDNA (5ul)	Slc22a3	40
E6		Slc22a3	Unknown	Undetermined								E6	RSDel/+	VE70	cDNA (5ul)	Slc22a3	40
E7		Slc22a3	Unknown	Undetermined								E7	RSDel/+	VE73	cDNA (5ul)	Slc22a3	40
E8		Slc22a3	Unknown	Undetermined								E8	RSDel/+	VE73	cDNA (5ul)	Slc22a3	40
E9		Slc22a3	Unknown	Undetermined								E9	RSDel/+	VE73	cDNA (5ul)	Slc22a3	40
E10		Slc22a3	Unknown	Undetermined								E10	RSDel/+	VE74	cDNA (5ul)	Slc22a3	40
E11		Slc22a3	Unknown	Undetermined								E11	RSDel/+	VE74	cDNA (5ul)	Slc22a3	40
E12		Slc22a3	Unknown	Undetermined								E12	RSDel/+	VE74	cDNA (5ul)	Slc22a3	40
F1		Slc22a3	Unknown	Undetermined								F1	RSDel/+	VE75	cDNA (5ul)	Slc22a3	40
F2		Slc22a3	Unknown	Undetermined								F2	RSDel/+	VE75	cDNA (5ul)	Slc22a3	40
F3		Slc22a3	Unknown	Undetermined								F3	RSDel/+	VE75	cDNA (5ul)	Slc22a3	40
F4		Slc22a3	Unknown	Undetermined								F4	+/+	VE80	cDNA (5ul)	Slc22a3	40
F5		Slc22a3	Unknown	Undetermined								F5	+/+	VE80	cDNA (5ul)	Slc22a3	40
F6		Slc22a3	Unknown	Undetermined								F6	+/+	VE80	cDNA (5ul)	Slc22a3	40
F7		Slc22a3	Unknown	38.77								F7	+/+	VE81	cDNA (5ul)	Slc22a3	38.77
F8		Slc22a3	Unknown	37.57								F8	+/+	VE81	cDNA (5ul)	Slc22a3	37.57
F9		Slc22a3	Unknown	37.5								F9	+/+	VE81	cDNA (5ul)	Slc22a3	37.5
F10		Slc22a3	Unknown	Undetermined								F10	+/+	VE82	cDNA (5ul)	Slc22a3	40
F11		Slc22a3	Unknown	Undetermined								F11	+/+	VE82	cDNA (5ul)	Slc22a3	40
F12		Slc22a3	Unknown	Undetermined								F12	+/+	VE82	cDNA (5ul)	Slc22a3	40
G1		Slc22a3	Unknown	Undetermined								G1	+/+	VE83	cDNA (5ul)	Slc22a3	40
G2		Slc22a3	Unknown	Undetermined								G2	+/+	VE83	cDNA (5ul)	Slc22a3	40
G3		Slc22a3	Unknown	Undetermined								G3	+/+	VE83	cDNA (5ul)	Slc22a3	40
G4		Slc22a3	Unknown	39.78								G4	+/+	VE86	cDNA (5ul)	Slc22a3	39.78
G5		Slc22a3	Unknown	39.54								G5	+/+	VE86	cDNA (5ul)	Slc22a3	39.54
G6		Slc22a3	Unknown	39.92								G6	+/+	VE86	cDNA (5ul)	Slc22a3	39.92
G7		Slc22a3	Unknown	Undetermined								G7	+/+	VE87	cDNA (5ul)	Slc22a3	40
G8		Slc22a3	Unknown	Undetermined								G8	+/+	VE87	cDNA (5ul)	Slc22a3	40
G9		Slc22a3	Unknown	Undetermined								G9	+/+	VE87	cDNA (5ul)	Slc22a3	40
G10		Slc22a3	Unknown	Undetermined								G10	+/RSDel	VE78	cDNA (5ul)	Slc22a3	40
G11		Slc22a3	Unknown	Undetermined								G11	+/RSDel	VE78	cDNA (5ul)	Slc22a3	40
G12		Slc22a3	Unknown	Undetermined								G12	+/RSDel	VE78	cDNA (5ul)	Slc22a3	40
H1		Slc22a3	Unknown	Undetermined								H1	+/RSDel	VE79	cDNA (5ul)	Slc22a3	40
H2		Slc22a3	Unknown	Undetermined								H2	+/RSDel	VE79	cDNA (5ul)	Slc22a3	40
H3		Slc22a3	Unknown	Undetermined								H3	+/RSDel	VE79	cDNA (5ul)	Slc22a3	40
H4		Slc22a3	Unknown	37.32								H4	+/RSDel	VE84	cDNA (5ul)	Slc22a3	37.32
H5		Slc22a3	Unknown	37.44								H5	+/RSDel	VE84	cDNA (5ul)	Slc22a3	37.44
H6		Slc22a3	Unknown	36.88								H6	+/RSDel	VE84	cDNA (5ul)	Slc22a3	36.88
H7		Slc22a3	Unknown	Undetermined								H7	+/RSDel	VE85	cDNA (5ul)	Slc22a3	40
H8		Slc22a3	Unknown	Undetermined								H8	+/RSDel	VE85	cDNA (5ul)	Slc22a3	40
H9		Slc22a3	Unknown	Undetermined								H9	+/RSDel	VE85	cDNA (5ul)	Slc22a3	40
H10		Slc22a3	Unknown	Undetermined								H10	+/RSDel	VE88	cDNA (5ul)	Slc22a3	40
H11		Slc22a3	Unknown	Undetermined								H11	+/RSDel	VE88	cDNA (5ul)	Slc22a3	40
H12		Slc22a3	Unknown	Undetermined								H12	+/RSDel	VE88	cDNA (5ul)	Slc22a3	40

## Sheet: Airn cDNA
Document Name: 130315_RSDel_E95_VE_Airn_cDNA-.sds
Plate Type: Absolute Quantification
User: 7000
Document Information
Operator: 7000
Run Date: Friday	March 13	2015 12:28:48
Last Modified: Friday	March 13	2015 13:52:09
Instrument Type: Applied Biosystems 7000 Real-Time PCR System
Comments:
SDS v1.2
Well	Sample Name	Detector	Task	Ct	StdDev Ct	Qty	Mean Qty	StdDev Qty	Filtered	Tm		Well	Sample Name			Detector	Ct
A1		Air Middle	Unknown	29.34								A1	Thp/+ & +Thp/+	E12.5 VYS (150408)	cDNA (5ul)	Air Middle	29.34		29.37	0.137477	1000	3
A2		Air Middle	Unknown	29.52								A2	Thp/+ & +Thp/+	E12.5 VYS (150408)	cDNA (5ul)	Air Middle	29.52
A3		Air Middle	Unknown	29.25								A3	Thp/+ & +Thp/+	E12.5 VYS (150408)	cDNA (5ul)	Air Middle	29.25
A4		Air Middle	Unknown	31.32								A4	Thp/+ & +Thp/+	E12.5 VYS (150408)	1:4 (5ul)	Air Middle	31.32		31.33	0.1253	250	2.39794
A5		Air Middle	Unknown	31.46								A5	Thp/+ & +Thp/+	E12.5 VYS (150408)	1:4 (5ul)	Air Middle	31.46
A6		Air Middle	Unknown	31.21								A6	Thp/+ & +Thp/+	E12.5 VYS (150408)	1:4 (5ul)	Air Middle	31.21
A7		Air Middle	Unknown	33.31								A7	Thp/+ & +Thp/+	E12.5 VYS (150408)	1:16 (5ul)	Air Middle	33.31		33.1067	0.270247	62.5	1.79588
A8		Air Middle	Unknown	33.21								A8	Thp/+ & +Thp/+	E12.5 VYS (150408)	1:16 (5ul)	Air Middle	33.21
A9		Air Middle	Unknown	32.8								A9	Thp/+ & +Thp/+	E12.5 VYS (150408)	1:16 (5ul)	Air Middle	32.8
A10		Air Middle	Unknown	35.29								A10	Thp/+ & +Thp/+	E12.5 VYS (150408)	1:64 (5ul)	Air Middle	35.29		35.41	0.169706	15.625	1.19382
A11		Air Middle	Unknown	35.53								A11	Thp/+ & +Thp/+	E12.5 VYS (150408)	1:64 (5ul)	Air Middle	35.53
B1		Air Middle	Unknown	31.09								B1	+/+	VE58	cDNA (5ul)	Air Middle	31.09
B2		Air Middle	Unknown	30.99								B2	+/+	VE58	cDNA (5ul)	Air Middle	30.99
B3		Air Middle	Unknown	31.02								B3	+/+	VE58	cDNA (5ul)	Air Middle	31.02
B4		Air Middle	Unknown	31.68								B4	+/+	VE60	cDNA (5ul)	Air Middle	31.68
B5		Air Middle	Unknown	31.91								B5	+/+	VE60	cDNA (5ul)	Air Middle	31.91
B6		Air Middle	Unknown	31.63								B6	+/+	VE60	cDNA (5ul)	Air Middle	31.63
B7		Air Middle	Unknown	33.01								B7	+/+	VE61	cDNA (5ul)	Air Middle	33.01
B8		Air Middle	Unknown	32.19								B8	+/+	VE61	cDNA (5ul)	Air Middle	32.19
B9		Air Middle	Unknown	32.38								B9	+/+	VE61	cDNA (5ul)	Air Middle	32.38
B10		Air Middle	Unknown	31.28								B10	+/+	VE63	cDNA (5ul)	Air Middle	31.28
B11		Air Middle	Unknown	31.54								B11	+/+	VE63	cDNA (5ul)	Air Middle	31.54
B12		Air Middle	Unknown	31.17								B12	+/+	VE63	cDNA (5ul)	Air Middle	31.17
C1		Air Middle	Unknown	30.03								C1	+/+	VE65	cDNA (5ul)	Air Middle	30.03
C2		Air Middle	Unknown	30.22								C2	+/+	VE65	cDNA (5ul)	Air Middle	30.22
C3		Air Middle	Unknown	29.73								C3	+/+	VE65	cDNA (5ul)	Air Middle	29.73
C4		Air Middle	Unknown	30.9								C4	+/+	VE68	cDNA (5ul)	Air Middle	30.9
C5		Air Middle	Unknown	30.86								C5	+/+	VE68	cDNA (5ul)	Air Middle	30.86
C6		Air Middle	Unknown	30.82								C6	+/+	VE68	cDNA (5ul)	Air Middle	30.82
C7		Air Middle	Unknown	32.39								C7	+/+	VE69	cDNA (5ul)	Air Middle	32.39
C8		Air Middle	Unknown	32.21								C8	+/+	VE69	cDNA (5ul)	Air Middle	32.21
C9		Air Middle	Unknown	32.29								C9	+/+	VE69	cDNA (5ul)	Air Middle	32.29
C10		Air Middle	Unknown	30.43								C10	+/+	VE71	cDNA (5ul)	Air Middle	30.43
C11		Air Middle	Unknown	30.37								C11	+/+	VE71	cDNA (5ul)	Air Middle	30.37
C12		Air Middle	Unknown	30.09								C12	+/+	VE71	cDNA (5ul)	Air Middle	30.09
D1		Air Middle	Unknown	30.76								D1	RSDel/+	VE59	cDNA (5ul)	Air Middle	30.76
D2		Air Middle	Unknown	30.66								D2	RSDel/+	VE59	cDNA (5ul)	Air Middle	30.66
D3		Air Middle	Unknown	30.27								D3	RSDel/+	VE59	cDNA (5ul)	Air Middle	30.27
D4		Air Middle	Unknown	31.33								D4	RSDel/+	VE62	cDNA (5ul)	Air Middle	31.33
D5		Air Middle	Unknown	31.33								D5	RSDel/+	VE62	cDNA (5ul)	Air Middle	31.33
D6		Air Middle	Unknown	31.7								D6	RSDel/+	VE62	cDNA (5ul)	Air Middle	31.7
D7		Air Middle	Unknown	31.23								D7	RSDel/+	VE64	cDNA (5ul)	Air Middle	31.23
D8		Air Middle	Unknown	31.35								D8	RSDel/+	VE64	cDNA (5ul)	Air Middle	31.35
D9		Air Middle	Unknown	31.22								D9	RSDel/+	VE64	cDNA (5ul)	Air Middle	31.22
D10		Air Middle	Unknown	30.85								D10	RSDel/+	VE66	cDNA (5ul)	Air Middle	30.85
D11		Air Middle	Unknown	30.9								D11	RSDel/+	VE66	cDNA (5ul)	Air Middle	30.9
D12		Air Middle	Unknown	31.12								D12	RSDel/+	VE66	cDNA (5ul)	Air Middle	31.12
E1		Air Middle	Unknown	30.25								E1	RSDel/+	VE67	cDNA (5ul)	Air Middle	30.25
E2		Air Middle	Unknown	29.89								E2	RSDel/+	VE67	cDNA (5ul)	Air Middle	29.89
E3		Air Middle	Unknown	30.08								E3	RSDel/+	VE67	cDNA (5ul)	Air Middle	30.08
E4		Air Middle	Unknown	33.2								E4	RSDel/+	VE70	cDNA (5ul)	Air Middle	33.2
E5		Air Middle	Unknown	33.79								E5	RSDel/+	VE70	cDNA (5ul)	Air Middle	33.79
E6		Air Middle	Unknown	33.77								E6	RSDel/+	VE70	cDNA (5ul)	Air Middle	33.77
E7		Air Middle	Unknown	32.63								E7	RSDel/+	VE73	cDNA (5ul)	Air Middle	32.63
E8		Air Middle	Unknown	32.9								E8	RSDel/+	VE73	cDNA (5ul)	Air Middle	32.9
E9		Air Middle	Unknown	32.74								E9	RSDel/+	VE73	cDNA (5ul)	Air Middle	32.74
E10		Air Middle	Unknown	30.56								E10	RSDel/+	VE74	cDNA (5ul)	Air Middle	30.56
E11		Air Middle	Unknown	30.59								E11	RSDel/+	VE74	cDNA (5ul)	Air Middle	30.59
E12		Air Middle	Unknown	30.7								E12	RSDel/+	VE74	cDNA (5ul)	Air Middle	30.7
F1		Air Middle	Unknown	31.61								F1	RSDel/+	VE75	cDNA (5ul)	Air Middle	31.61
F2		Air Middle	Unknown	31.53								F2	RSDel/+	VE75	cDNA (5ul)	Air Middle	31.53
F3		Air Middle	Unknown	31.6								F3	RSDel/+	VE75	cDNA (5ul)	Air Middle	31.6
F4		Air Middle	Unknown	32.79								F4	+/+	VE80	cDNA (5ul)	Air Middle	32.79
F5		Air Middle	Unknown	33.32								F5	+/+	VE80	cDNA (5ul)	Air Middle	33.32
F6		Air Middle	Unknown	33.01								F6	+/+	VE80	cDNA (5ul)	Air Middle	33.01
F7		Air Middle	Unknown	30.41								F7	+/+	VE81	cDNA (5ul)	Air Middle	30.41
F8		Air Middle	Unknown	30.53								F8	+/+	VE81	cDNA (5ul)	Air Middle	30.53
F9		Air Middle	Unknown	30.51								F9	+/+	VE81	cDNA (5ul)	Air Middle	30.51
F10		Air Middle	Unknown	30.95								F10	+/+	VE82	cDNA (5ul)	Air Middle	30.95
F11		Air Middle	Unknown	31.05								F11	+/+	VE82	cDNA (5ul)	Air Middle	31.05
F12		Air Middle	Unknown	31.02								F12	+/+	VE82	cDNA (5ul)	Air Middle	31.02
G1		Air Middle	Unknown	34.27								G1	+/+	VE83	cDNA (5ul)	Air Middle	34.27
G2		Air Middle	Unknown	34.75								G2	+/+	VE83	cDNA (5ul)	Air Middle	34.75
G3		Air Middle	Unknown	34.59								G3	+/+	VE83	cDNA (5ul)	Air Middle	34.59
G4		Air Middle	Unknown	30.56								G4	+/+	VE86	cDNA (5ul)	Air Middle	30.56
G5		Air Middle	Unknown	30.73								G5	+/+	VE86	cDNA (5ul)	Air Middle	30.73
G6		Air Middle	Unknown	30.84								G6	+/+	VE86	cDNA (5ul)	Air Middle	30.84
G7		Air Middle	Unknown	33.84								G7	+/+	VE87	cDNA (5ul)	Air Middle	33.84
G8		Air Middle	Unknown	34.16								G8	+/+	VE87	cDNA (5ul)	Air Middle	34.16
G9		Air Middle	Unknown	34.29								G9	+/+	VE87	cDNA (5ul)	Air Middle	34.29
G10		Air Middle	Unknown	Undetermined								G10	+/RSDel	VE78	cDNA (5ul)	Air Middle	40
G11		Air Middle	Unknown	Undetermined								G11	+/RSDel	VE78	cDNA (5ul)	Air Middle	40
G12		Air Middle	Unknown	39.17								G12	+/RSDel	VE78	cDNA (5ul)	Air Middle	39.17
H1		Air Middle	Unknown	Undetermined								H1	+/RSDel	VE79	cDNA (5ul)	Air Middle	40
H2		Air Middle	Unknown	Undetermined								H2	+/RSDel	VE79	cDNA (5ul)	Air Middle	40
H3		Air Middle	Unknown	Undetermined								H3	+/RSDel	VE79	cDNA (5ul)	Air Middle	40
H4		Air Middle	Unknown	35.25								H4	+/RSDel	VE84	cDNA (5ul)	Air Middle	35.25
H5		Air Middle	Unknown	34.67								H5	+/RSDel	VE84	cDNA (5ul)	Air Middle	34.67
H6		Air Middle	Unknown	34.64								H6	+/RSDel	VE84	cDNA (5ul)	Air Middle	34.64
H7		Air Middle	Unknown	Undetermined								H7	+/RSDel	VE85	cDNA (5ul)	Air Middle	40
H8		Air Middle	Unknown	Undetermined								H8	+/RSDel	VE85	cDNA (5ul)	Air Middle	40
H9		Air Middle	Unknown	Undetermined								H9	+/RSDel	VE85	cDNA (5ul)	Air Middle	40
H10		Air Middle	Unknown	Undetermined								H10	+/RSDel	VE88	cDNA (5ul)	Air Middle	40
H11		Air Middle	Unknown	Undetermined								H11	+/RSDel	VE88	cDNA (5ul)	Air Middle	40
H12		Air Middle	Unknown	39.9								H12	+/RSDel	VE88	cDNA (5ul)	Air Middle	39.9

## Sheet: Tcp1 cDNA
Document Name: 130315_RSDel_E95_VE_Tcp1_cDNA-.sds
Plate Type: Absolute Quantification
User: 7000
Document Information
Operator: 7000
Run Date: Friday	March 13	2015 14:07:35
Last Modified: Friday	March 13	2015 16:07:49
Instrument Type: Applied Biosystems 7000 Real-Time PCR System
Comments:
SDS v1.2
Well	Sample Name	Detector	Task	Ct	StdDev Ct	Qty	Mean Qty	StdDev Qty	Filtered	Tm		Well	Sample Name			Detector	Ct
A1		Tcp1	Unknown	23.47						81.1		A1	Thp/+ & +Thp/+	E12.5 VYS (150408)	cDNA (5ul)	Tcp1	23.47		23.3633	0.12897	1000	3
A2		Tcp1	Unknown	23.4						81.4		A2	Thp/+ & +Thp/+	E12.5 VYS (150408)	cDNA (5ul)	Tcp1	23.4
A3		Tcp1	Unknown	23.22						81.4		A3	Thp/+ & +Thp/+	E12.5 VYS (150408)	cDNA (5ul)	Tcp1	23.22
A4		Tcp1	Unknown	25.14						81.1		A4	Thp/+ & +Thp/+	E12.5 VYS (150408)	1:4 (5ul)	Tcp1	25.14		25.12	0.02	250	2.39794
A5		Tcp1	Unknown	25.1						81.4		A5	Thp/+ & +Thp/+	E12.5 VYS (150408)	1:4 (5ul)	Tcp1	25.1
A6		Tcp1	Unknown	25.12						81.4		A6	Thp/+ & +Thp/+	E12.5 VYS (150408)	1:4 (5ul)	Tcp1	25.12
A7		Tcp1	Unknown	27.07						81.4		A7	Thp/+ & +Thp/+	E12.5 VYS (150408)	1:16 (5ul)	Tcp1	27.07		27.0133	0.0493288	62.5	1.79588
A8		Tcp1	Unknown	26.98						81.4		A8	Thp/+ & +Thp/+	E12.5 VYS (150408)	1:16 (5ul)	Tcp1	26.98
A9		Tcp1	Unknown	26.99						81.4		A9	Thp/+ & +Thp/+	E12.5 VYS (150408)	1:16 (5ul)	Tcp1	26.99
A10		Tcp1	Unknown	29.3						81.4		A10	Thp/+ & +Thp/+	E12.5 VYS (150408)	1:64 (5ul)	Tcp1	29.3		29.2267	0.0702377	15.625	1.19382
A11		Tcp1	Unknown	29.22						81.4		A11	Thp/+ & +Thp/+	E12.5 VYS (150408)	1:64 (5ul)	Tcp1	29.22
A12		Tcp1	Unknown	29.16						81.7		A12	Thp/+ & +Thp/+	E12.5 VYS (150408)	1:64 (5ul)	Tcp1	29.16
B1		Tcp1	Unknown	24.55						81.7		B1	+/+	VE58	cDNA (5ul)	Tcp1	24.55
B2		Tcp1	Unknown	24.61						81.7		B2	+/+	VE58	cDNA (5ul)	Tcp1	24.61
B3		Tcp1	Unknown	24.52						81.4		B3	+/+	VE58	cDNA (5ul)	Tcp1	24.52
B4		Tcp1	Unknown	24.29						81.4		B4	+/+	VE60	cDNA (5ul)	Tcp1	24.29
B5		Tcp1	Unknown	24.21						81.4		B5	+/+	VE60	cDNA (5ul)	Tcp1	24.21
B6		Tcp1	Unknown	24.07						81.4		B6	+/+	VE60	cDNA (5ul)	Tcp1	24.07
B7		Tcp1	Unknown	24.64						81.7		B7	+/+	VE61	cDNA (5ul)	Tcp1	24.64
B8		Tcp1	Unknown	24.75						81.7		B8	+/+	VE61	cDNA (5ul)	Tcp1	24.75
B9		Tcp1	Unknown	24.42						81.7		B9	+/+	VE61	cDNA (5ul)	Tcp1	24.42
B10		Tcp1	Unknown	23.61						81.7		B10	+/+	VE63	cDNA (5ul)	Tcp1	23.61
B11		Tcp1	Unknown	23.6						81.7		B11	+/+	VE63	cDNA (5ul)	Tcp1	23.6
B12		Tcp1	Unknown	23.55						81.4		B12	+/+	VE63	cDNA (5ul)	Tcp1	23.55
C1		Tcp1	Unknown	22.94						81.7		C1	+/+	VE65	cDNA (5ul)	Tcp1	22.94
C2		Tcp1	Unknown	23.32						81.7		C2	+/+	VE65	cDNA (5ul)	Tcp1	23.32
C3		Tcp1	Unknown	23.05						81.7		C3	+/+	VE65	cDNA (5ul)	Tcp1	23.05
C4		Tcp1	Unknown	23.05						81.4		C4	+/+	VE68	cDNA (5ul)	Tcp1	23.05
C5		Tcp1	Unknown	23.71						81.4		C5	+/+	VE68	cDNA (5ul)	Tcp1	23.71
C6		Tcp1	Unknown	23.52						81.4		C6	+/+	VE68	cDNA (5ul)	Tcp1	23.52
C7		Tcp1	Unknown	24.22						81.7		C7	+/+	VE69	cDNA (5ul)	Tcp1	24.22
C8		Tcp1	Unknown	24.16						81.7		C8	+/+	VE69	cDNA (5ul)	Tcp1	24.16
C9		Tcp1	Unknown	24.06						81.7		C9	+/+	VE69	cDNA (5ul)	Tcp1	24.06
C10		Tcp1	Unknown	23.45						81.7		C10	+/+	VE71	cDNA (5ul)	Tcp1	23.45
C11		Tcp1	Unknown	22.55						81.7		C11	+/+	VE71	cDNA (5ul)	Tcp1	22.55
C12		Tcp1	Unknown	22.18						81.4		C12	+/+	VE71	cDNA (5ul)	Tcp1	22.18
D1		Tcp1	Unknown	24.65						81.7		D1	RSDel/+	VE59	cDNA (5ul)	Tcp1	24.65
D2		Tcp1	Unknown	25.48						82		D2	RSDel/+	VE59	cDNA (5ul)	Tcp1	25.48
D3		Tcp1	Unknown	25.39						81.7		D3	RSDel/+	VE59	cDNA (5ul)	Tcp1	25.39
D4		Tcp1	Unknown	25.21						81.7		D4	RSDel/+	VE62	cDNA (5ul)	Tcp1	25.21
D5		Tcp1	Unknown	25.19						81.7		D5	RSDel/+	VE62	cDNA (5ul)	Tcp1	25.19
D6		Tcp1	Unknown	25.36						81.7		D6	RSDel/+	VE62	cDNA (5ul)	Tcp1	25.36
D7		Tcp1	Unknown	25.61						81.7		D7	RSDel/+	VE64	cDNA (5ul)	Tcp1	25.61
D8		Tcp1	Unknown	25.14						81.7		D8	RSDel/+	VE64	cDNA (5ul)	Tcp1	25.14
D9		Tcp1	Unknown	25.08						81.7		D9	RSDel/+	VE64	cDNA (5ul)	Tcp1	25.08
D10		Tcp1	Unknown	25.14						82		D10	RSDel/+	VE66	cDNA (5ul)	Tcp1	25.14
D11		Tcp1	Unknown	25.05						82		D11	RSDel/+	VE66	cDNA (5ul)	Tcp1	25.05
D12		Tcp1	Unknown	24.88						81.7		D12	RSDel/+	VE66	cDNA (5ul)	Tcp1	24.88
E1		Tcp1	Unknown	24.38						81.7		E1	RSDel/+	VE67	cDNA (5ul)	Tcp1	24.38
E2		Tcp1	Unknown	24.32						81.7		E2	RSDel/+	VE67	cDNA (5ul)	Tcp1	24.32
E3		Tcp1	Unknown	24.53						81.7		E3	RSDel/+	VE67	cDNA (5ul)	Tcp1	24.53
E4		Tcp1	Unknown	31.42						81.7		E4	RSDel/+	VE70	cDNA (5ul)	Tcp1	31.42
E5		Tcp1	Unknown	28.5						81.7		E5	RSDel/+	VE70	cDNA (5ul)	Tcp1	28.5
E6		Tcp1	Unknown	28.7						81.7		E6	RSDel/+	VE70	cDNA (5ul)	Tcp1	28.7
E7		Tcp1	Unknown	26.49						81.7		E7	RSDel/+	VE73	cDNA (5ul)	Tcp1	26.49
E8		Tcp1	Unknown	26.74						81.4		E8	RSDel/+	VE73	cDNA (5ul)	Tcp1	26.74
E9		Tcp1	Unknown	26.55						81.7		E9	RSDel/+	VE73	cDNA (5ul)	Tcp1	26.55
E10		Tcp1	Unknown	24.24						82		E10	RSDel/+	VE74	cDNA (5ul)	Tcp1	24.24
E11		Tcp1	Unknown	24.26						82		E11	RSDel/+	VE74	cDNA (5ul)	Tcp1	24.26
E12		Tcp1	Unknown	24.11						81.7		E12	RSDel/+	VE74	cDNA (5ul)	Tcp1	24.11
F1		Tcp1	Unknown	25.78						81.4		F1	RSDel/+	VE75	cDNA (5ul)	Tcp1	25.78
F2		Tcp1	Unknown	25.83						81.7		F2	RSDel/+	VE75	cDNA (5ul)	Tcp1	25.83
F3		Tcp1	Unknown	25.92						81.7		F3	RSDel/+	VE75	cDNA (5ul)	Tcp1	25.92
F4		Tcp1	Unknown	24.21						81.4		F4	+/+	VE80	cDNA (5ul)	Tcp1	24.21
F5		Tcp1	Unknown	24.18						81.4		F5	+/+	VE80	cDNA (5ul)	Tcp1	24.18
F6		Tcp1	Unknown	24.15						81.7		F6	+/+	VE80	cDNA (5ul)	Tcp1	24.15
F7		Tcp1	Unknown	22.8						81.7		F7	+/+	VE81	cDNA (5ul)	Tcp1	22.8
F8		Tcp1	Unknown	22.69						81.7		F8	+/+	VE81	cDNA (5ul)	Tcp1	22.69
F9		Tcp1	Unknown	22.77						81.7		F9	+/+	VE81	cDNA (5ul)	Tcp1	22.77
F10		Tcp1	Unknown	23.1						82		F10	+/+	VE82	cDNA (5ul)	Tcp1	23.1
F11		Tcp1	Unknown	22.85						81.7		F11	+/+	VE82	cDNA (5ul)	Tcp1	22.85
F12		Tcp1	Unknown	22.61						81.7		F12	+/+	VE82	cDNA (5ul)	Tcp1	22.61
G1		Tcp1	Unknown	26.11						81.4		G1	+/+	VE83	cDNA (5ul)	Tcp1	26.11
G2		Tcp1	Unknown	25.02						81.4		G2	+/+	VE83	cDNA (5ul)	Tcp1	25.02
G3		Tcp1	Unknown	25						81.4		G3	+/+	VE83	cDNA (5ul)	Tcp1	25
G4		Tcp1	Unknown	23.14						81.4		G4	+/+	VE86	cDNA (5ul)	Tcp1	23.14
G5		Tcp1	Unknown	23.08						81.4		G5	+/+	VE86	cDNA (5ul)	Tcp1	23.08
G6		Tcp1	Unknown	23.1						81.4		G6	+/+	VE86	cDNA (5ul)	Tcp1	23.1
G7		Tcp1	Unknown	27.37						81.7		G7	+/+	VE87	cDNA (5ul)	Tcp1	27.37
G8		Tcp1	Unknown	26.96						81.7		G8	+/+	VE87	cDNA (5ul)	Tcp1	26.96
G9		Tcp1	Unknown	26.94						81.7		G9	+/+	VE87	cDNA (5ul)	Tcp1	26.94
G10		Tcp1	Unknown	24.93						81.7		G10	+/RSDel	VE78	cDNA (5ul)	Tcp1	24.93
G11		Tcp1	Unknown	25.22						81.7		G11	+/RSDel	VE78	cDNA (5ul)	Tcp1	25.22
G12		Tcp1	Unknown	24.85						81.7		G12	+/RSDel	VE78	cDNA (5ul)	Tcp1	24.85
H1		Tcp1	Unknown	28.02						80.8		H1	+/RSDel	VE79	cDNA (5ul)	Tcp1	28.02
H2		Tcp1	Unknown	30.05						81.4		H2	+/RSDel	VE79	cDNA (5ul)	Tcp1	30.05
H3		Tcp1	Unknown	28.14						81.1		H3	+/RSDel	VE79	cDNA (5ul)	Tcp1	28.14
H4		Tcp1	Unknown	24.22						81.1		H4	+/RSDel	VE84	cDNA (5ul)	Tcp1	24.22
H5		Tcp1	Unknown	24.28						81.4		H5	+/RSDel	VE84	cDNA (5ul)	Tcp1	24.28
H6		Tcp1	Unknown	25.27						81.1		H6	+/RSDel	VE84	cDNA (5ul)	Tcp1	25.27
H7		Tcp1	Unknown	35.16						81.7		H7	+/RSDel	VE85	cDNA (5ul)	Tcp1	35.16
H8		Tcp1	Unknown	32.6						81.4		H8	+/RSDel	VE85	cDNA (5ul)	Tcp1	32.6
H9		Tcp1	Unknown	32.47						81.7		H9	+/RSDel	VE85	cDNA (5ul)	Tcp1	32.47
H10		Tcp1	Unknown	24.05						81.4		H10	+/RSDel	VE88	cDNA (5ul)	Tcp1	24.05
H11		Tcp1	Unknown	24.09						81.7		H11	+/RSDel	VE88	cDNA (5ul)	Tcp1	24.09
H12		Tcp1	Unknown	24.01						81.1		H12	+/RSDel	VE88	cDNA (5ul)	Tcp1	24.01

## Sheet: Analysis
				Cyclo		y = -3.5716x + 31.547		31.547	-3.5716								Figure 1D, Left Panel: RT-qPCR expression analysis of the RSDel maternal deletion (red, RSDel/+) and paternal deletion (blue, +/RSDel) in E9.5 VYS endoderm
				(cDNA)
Well	Sample Name			Detector	Ct	log	linear	stdev	cv unnorm	mean	cDNA-RT-	RT-		Sample Name						Airn						Tcp1						Slc22a3
B1	+/+	VE58	cDNA (5ul)	Cyclo	24.62	1.93947	86.9895	16.6498	0.243047	68.5042	68.4984	0.00580364		+/+	VE58				RSDel/+			+/RSDel			RSDel/+			+/RSDel			RSDel/+			+/RSDel
B2	+/+	VE58	cDNA (5ul)	Cyclo	25.34	1.73788	54.6861							+/+	VE58		Genotype	Sample Name	Normalised expression	Genotype	Sample Name	Normalised expression	Genotype	Sample Name	Normalised expression	Genotype	Sample Name	Normalised expression	Genotype	Sample Name	Normalised expression	Genotype	Sample Name	Normalised expression
B3	+/+	VE58	cDNA (5ul)	Cyclo	25.1	1.80507	63.8371							+/+	VE58		RSDel/+	VE59	131.669	+/RSDel	VE78	0.509402	RSDel/+	VE59	31.8328	+/RSDel	VE78	56.1532	RSDel/+	VE59	70.2122	+/RSDel	VE78	172.073
B4	+/+	VE60	cDNA (5ul)	Cyclo	24.65	1.93107	85.3232	8.58876	0.0925077	92.8438	92.7897	0.0540809		+/+	VE60		RSDel/+	VE62	83.654	+/RSDel	VE79	1.9131	RSDel/+	VE62	34.4235	+/RSDel	VE79	22.1291	RSDel/+	VE62	53.8229	+/RSDel	VE79	65.1907
B5	+/+	VE60	cDNA (5ul)	Cyclo	24.55	1.95907	91.0051							+/+	VE60		RSDel/+	VE64	100.605	+/RSDel	VE84	11.3097	RSDel/+	VE64	36.4196	+/RSDel	VE84	60.0349	RSDel/+	VE64	80.6933	+/RSDel	VE84	221.562
B6	+/+	VE60	cDNA (5ul)	Cyclo	24.37	2.00946	102.203							+/+	VE60		RSDel/+	VE66	155.625	+/RSDel	VE85	28.4583	RSDel/+	VE66	53.6518	+/RSDel	VE85	13.2664	RSDel/+	VE66	127.944	+/RSDel	VE85	172.013
B7	+/+	VE61	cDNA (5ul)	Cyclo	25.06	1.81627	65.5048	8.67292	0.155684	55.7084	55.6971	0.0113158		+/+	VE61		RSDel/+	VE67	174.188	+/RSDel	VE88	0.171176	RSDel/+	VE67	50.0572	+/RSDel	VE88	45.4062	RSDel/+	VE67	57.1407	+/RSDel	VE88	165.417
B8	+/+	VE61	cDNA (5ul)	Cyclo	25.51	1.69028	49.0093							+/+	VE61		RSDel/+	VE70	211.23				RSDel/+	VE70	25.0014				RSDel/+	VE70	71.0849
B9	+/+	VE61	cDNA (5ul)	Cyclo	25.4	1.72108	52.6111							+/+	VE61		RSDel/+	VE73	116.776	+/RSDel	Mean	8.47234	RSDel/+	VE73	46.1793	+/RSDel	Mean	39.398	RSDel/+	VE73	74.6695	+/RSDel	Mean	159.251
B10	+/+	VE63	cDNA (5ul)	Cyclo	24.34	2.01786	104.199	23.1734	0.216614	106.98	106.972	0.00883258		+/+	VE63		RSDel/+	VE74	135.189				RSDel/+	VE74	65.9485				RSDel/+	VE74	82.1101
B11	+/+	VE63	cDNA (5ul)	Cyclo	24.65	1.93107	85.3232							+/+	VE63		RSDel/+	VE75	169.341				RSDel/+	VE75	50.3335				RSDel/+	VE75	70.8052
B12	+/+	VE63	cDNA (5ul)	Cyclo	23.98	2.11866	131.419							+/+	VE63
C1	+/+	VE65	cDNA (5ul)	Cyclo	23.18	2.34265	220.114	35.7864	0.194344	184.139	184.037	0.102425		+/+	VE65		RSDel/+	Mean	142.031				RSDel/+	Mean	43.7609				RSDel/+	Mean	76.498
C2	+/+	VE65	cDNA (5ul)	Cyclo	23.79	2.17186	148.544							+/+	VE65
C3	+/+	VE65	cDNA (5ul)	Cyclo	23.46	2.26425	183.76							+/+	VE65				Note: Values plotted in the figure are highlighted
C4	+/+	VE68	cDNA (5ul)	Cyclo	24.02	2.10746	128.073	18.3191	0.124804	146.783	146.753	0.0297763		+/+	VE68
C5	+/+	VE68	cDNA (5ul)	Cyclo	23.8	2.16906	147.59							+/+	VE68
C6	+/+	VE68	cDNA (5ul)	Cyclo	23.63	2.21665	164.685							+/+	VE68
C7	+/+	VE69	cDNA (5ul)	Cyclo	25.05	1.81907	65.9284	5.54038	0.0925077	59.8911	59.8851	0.00592591		+/+	VE69
C8	+/+	VE69	cDNA (5ul)	Cyclo	25.23	1.76868	58.705							+/+	VE69
C9	+/+	VE69	cDNA (5ul)	Cyclo	25.33	1.74068	55.0397							+/+	VE69
C10	+/+	VE71	cDNA (5ul)	Cyclo	23.46	2.26425	183.76	54.6526	0.264708	206.464	206.444	0.0191451		+/+	VE71
C11	+/+	VE71	cDNA (5ul)	Cyclo	23.61	2.22225	166.822							+/+	VE71
C12	+/+	VE71	cDNA (5ul)	Cyclo	22.87	2.42944	268.809							+/+	VE71
D1	RSDel/+	VE59	cDNA (5ul)	Cyclo	23.94	2.12986	134.852	10.6709	0.0869509	122.723	122.717	0.00580364		RSDel/+	VE59
D2	RSDel/+	VE59	cDNA (5ul)	Cyclo	24.19	2.05986	114.779							RSDel/+	VE59
D3	RSDel/+	VE59	cDNA (5ul)	Cyclo	24.14	2.07386	118.539							RSDel/+	VE59
D4	RSDel/+	VE62	cDNA (5ul)	Cyclo	24.6	1.94507	88.1184	13.6167	0.131576	103.489	103.418	0.0712883		RSDel/+	VE62
D5	RSDel/+	VE62	cDNA (5ul)	Cyclo	24.28	2.03466	108.308							RSDel/+	VE62
D6	RSDel/+	VE62	cDNA (5ul)	Cyclo	24.2	2.05706	114.041							RSDel/+	VE62
D7	RSDel/+	VE64	cDNA (5ul)	Cyclo	24.04	2.10186	126.433	25.9552	0.266516	97.3869	97.3793	0.00760419		RSDel/+	VE64
D8	RSDel/+	VE64	cDNA (5ul)	Cyclo	24.58	1.95067	89.2619							RSDel/+	VE64
D9	RSDel/+	VE64	cDNA (5ul)	Cyclo	24.82	1.88347	76.4662							RSDel/+	VE64
D10	RSDel/+	VE66	cDNA (5ul)	Cyclo	24.98	1.83867	68.9718	13.1668	0.168103	78.3256	78.2828	0.0427572		RSDel/+	VE66
D11	RSDel/+	VE66	cDNA (5ul)	Cyclo	24.9	1.86107	72.6224							RSDel/+	VE66
D12	RSDel/+	VE66	cDNA (5ul)	Cyclo	24.51	1.97027	93.3825							RSDel/+	VE66
E1	RSDel/+	VE67	cDNA (5ul)	Cyclo	23.68	2.20265	159.461	26.2464	0.202283	129.751	129.383	0.367195		RSDel/+	VE67
E2	RSDel/+	VE67	cDNA (5ul)	Cyclo	24.26	2.04026	109.714							RSDel/+	VE67
E3	RSDel/+	VE67	cDNA (5ul)	Cyclo	24.12	2.07946	120.077							RSDel/+	VE67
E4	RSDel/+	VE70	cDNA (5ul)	Cyclo	28.28	0.914716	8.21705	1.21126	0.129136	9.37974	9.37393	0.00580364		RSDel/+	VE70
E5	RSDel/+	VE70	cDNA (5ul)	Cyclo	28.09	0.967914	9.28781							RSDel/+	VE70
E6	RSDel/+	VE70	cDNA (5ul)	Cyclo	27.88	1.02671	10.6343							RSDel/+	VE70
E7	RSDel/+	VE73	cDNA (5ul)	Cyclo	26.14	1.51389	32.6503	2.51797	0.0845706	29.7736	29.7678	0.00580364		RSDel/+	VE73
E8	RSDel/+	VE73	cDNA (5ul)	Cyclo	26.34	1.45789	28.7005							RSDel/+	VE73
E9	RSDel/+	VE73	cDNA (5ul)	Cyclo	26.38	1.44669	27.9699							RSDel/+	VE73
E10	RSDel/+	VE74	cDNA (5ul)	Cyclo	24.27	2.03746	109.009	22.3117	0.195729	113.993	113.939	0.0538159		RSDel/+	VE74
E11	RSDel/+	VE74	cDNA (5ul)	Cyclo	24.49	1.97587	94.5943							RSDel/+	VE74
E12	RSDel/+	VE74	cDNA (5ul)	Cyclo	23.9	2.14106	138.375							RSDel/+	VE74
F1	RSDel/+	VE75	cDNA (5ul)	Cyclo	25.2	1.77707	59.8515	12.1947	0.262332	46.4855	46.4793	0.0062228		RSDel/+	VE75
F2	RSDel/+	VE75	cDNA (5ul)	Cyclo	25.99	1.55589	35.9654							RSDel/+	VE75
F3	RSDel/+	VE75	cDNA (5ul)	Cyclo	25.69	1.63988	43.6397							RSDel/+	VE75
F4	+/+	VE80	cDNA (5ul)	Cyclo	24.5	1.97307	93.9865	12.3854	0.114814	107.873	107.843	0.0299683		+/+	VE80
F5	+/+	VE80	cDNA (5ul)	Cyclo	24.23	2.04866	111.857							+/+	VE80
F6	+/+	VE80	cDNA (5ul)	Cyclo	24.15	2.07106	117.777							+/+	VE80
F7	+/+	VE81	cDNA (5ul)	Cyclo	23.1	2.36505	231.764	38.0014	0.187778	202.374	201.938	0.436652		+/+	VE81
F8	+/+	VE81	cDNA (5ul)	Cyclo	23.21	2.33425	215.898							+/+	VE81
F9	+/+	VE81	cDNA (5ul)	Cyclo	23.68	2.20265	159.461							+/+	VE81
F10	+/+	VE82	cDNA (5ul)	Cyclo	23.49	2.25585	180.24	25.9626	0.146719	176.954	176.903	0.0509392		+/+	VE82
F11	+/+	VE82	cDNA (5ul)	Cyclo	23.78	2.17466	149.505							+/+	VE82
F12	+/+	VE82	cDNA (5ul)	Cyclo	23.32	2.30345	201.117							+/+	VE82
G1	+/+	VE83	cDNA (5ul)	Cyclo	25.02	1.82747	67.2159	15.6534	0.306633	51.0493	51.025	0.024271		+/+	VE83
G2	+/+	VE83	cDNA (5ul)	Cyclo	25.99	1.55589	35.9654							+/+	VE83
G3	+/+	VE83	cDNA (5ul)	Cyclo	25.48	1.69868	49.9664							+/+	VE83
G4	+/+	VE86	cDNA (5ul)	Cyclo	23.98	2.11866	131.419	19.5208	0.126798	153.951	153.811	0.139789		+/+	VE86
G5	+/+	VE86	cDNA (5ul)	Cyclo	23.63	2.21665	164.685							+/+	VE86
G6	+/+	VE86	cDNA (5ul)	Cyclo	23.62	2.21945	165.75							+/+	VE86
G7	+/+	VE87	cDNA (5ul)	Cyclo	27.05	1.2591	18.1593	2.23398	0.142975	15.625	15.5921	0.0328762		+/+	VE87
G8	+/+	VE87	cDNA (5ul)	Cyclo	27.37	1.1695	14.7742							+/+	VE87
G9	+/+	VE87	cDNA (5ul)	Cyclo	27.46	1.14431	13.9414							+/+	VE87
G10	+/RSDel	VE78	cDNA (5ul)	Cyclo	24.69	1.91987	83.1511	19.7071	0.225243	87.4929	87.4871	0.00580364		+/RSDel	VE78
G11	+/RSDel	VE78	cDNA (5ul)	Cyclo	24.95	1.84707	70.3188							+/RSDel	VE78
G12	+/RSDel	VE78	cDNA (5ul)	Cyclo	24.27	2.03746	109.009							+/RSDel	VE78
H1	+/RSDel	VE79	cDNA (5ul)	Cyclo	26.3	1.46909	29.4503	9.50533	0.5145	18.4749	18.4691	0.00580364		+/RSDel	VE79
H2	+/RSDel	VE79	cDNA (5ul)	Cyclo	27.58	1.11071	12.9035							+/RSDel	VE79
H3	+/RSDel	VE79	cDNA (5ul)	Cyclo	27.56	1.11631	13.0709							+/RSDel	VE79
H4	+/RSDel	VE84	cDNA (5ul)	Cyclo	24.35	2.01506	103.529	10.1656	0.0885199	114.84	113.578	1.2616		+/RSDel	VE84
H5	+/RSDel	VE84	cDNA (5ul)	Cyclo	24.15	2.07106	117.777							+/RSDel	VE84
H6	+/RSDel	VE84	cDNA (5ul)	Cyclo	24.08	2.09066	123.214							+/RSDel	VE84
H7	+/RSDel	VE85	cDNA (5ul)	Cyclo	31.08	0.130754	1.35131	0.160512	0.12924	1.24197	1.23616	0.00580364	* low	+/RSDel	VE85
H8	+/RSDel	VE85	cDNA (5ul)	Cyclo	31.12	0.119554	1.3169							+/RSDel	VE85
H9	+/RSDel	VE85	cDNA (5ul)	Cyclo	31.46	0.0243588	1.05769							+/RSDel	VE85
H10	+/RSDel	VE88	cDNA (5ul)	Cyclo	23.64	2.21385	163.627	97.9046	0.463024	211.446	211.438	0.00845969		+/RSDel	VE88
H11	+/RSDel	VE88	cDNA (5ul)	Cyclo	23.81	2.16626	146.641							+/RSDel	VE88
H12	+/RSDel	VE88	cDNA (5ul)	Cyclo	22.58	2.51064	324.07							+/RSDel	VE88
				Cyclo		y = -3.7571x + 31.598		31.598	-3.7571
				RT-
Well	Sample Name			Detector	Ct	log	linear	stdev	cv unnorm	mean
B1	+/+	VE58	RT- (5ul)	Cyclo	40	-2.2363	0.00580364	0	0	0.00580364
B2	+/+	VE58	RT- (5ul)	Cyclo	40	-2.2363	0.00580364
B3	+/+	VE58	RT- (5ul)	Cyclo	40	-2.2363	0.00580364
B4	+/+	VE60	RT- (5ul)	Cyclo	36.4	-1.27811	0.0527092	0.00324312	0.059968	0.0540809
B5	+/+	VE60	RT- (5ul)	Cyclo	36.43	-1.2861	0.051749
B6	+/+	VE60	RT- (5ul)	Cyclo	36.25	-1.23819	0.0577844
B7	+/+	VE61	RT- (5ul)	Cyclo	40	-2.2363	0.00580364	0.00490301	0.433289	0.0113158
B8	+/+	VE61	RT- (5ul)	Cyclo	38.43	-1.81842	0.0151906
B9	+/+	VE61	RT- (5ul)	Cyclo	38.69	-1.88763	0.0129531
B10	+/+	VE63	RT- (5ul)	Cyclo	40	-2.2363	0.00580364	0.00369762	0.418634	0.00883258
B11	+/+	VE63	RT- (5ul)	Cyclo	39.53	-2.1112	0.007741
B12	+/+	VE63	RT- (5ul)	Cyclo	38.69	-1.88763	0.0129531
C1	+/+	VE65	RT- (5ul)	Cyclo	35.27	-0.97735	0.105354	0.00354377	0.0345988	0.102425
C2	+/+	VE65	RT- (5ul)	Cyclo	35.3	-0.985334	0.103435
C3	+/+	VE65	RT- (5ul)	Cyclo	35.38	-1.00663	0.0984856
C4	+/+	VE68	RT- (5ul)	Cyclo	37.63	-1.60549	0.0248031	0.00486855	0.163504	0.0297763
C5	+/+	VE68	RT- (5ul)	Cyclo	37.32	-1.52298	0.0299928
C6	+/+	VE68	RT- (5ul)	Cyclo	37.09	-1.46177	0.034533
C7	+/+	VE69	RT- (5ul)	Cyclo	39.9	-2.20968	0.00617045	0.000211777	0.0357375	0.00592591
C8	+/+	VE69	RT- (5ul)	Cyclo	40	-2.2363	0.00580364
C9	+/+	VE69	RT- (5ul)	Cyclo	40	-2.2363	0.00580364
C10	+/+	VE71	RT- (5ul)	Cyclo	38.21	-1.75987	0.0173833	0.0068422	0.357386	0.0191451
C11	+/+	VE71	RT- (5ul)	Cyclo	38.64	-1.87432	0.0133562
C12	+/+	VE71	RT- (5ul)	Cyclo	37.51	-1.57355	0.026696
D1	RSDel/+	VE59	RT- (5ul)	Cyclo	40	-2.2363	0.00580364	0	0	0.00580364
D2	RSDel/+	VE59	RT- (5ul)	Cyclo	40	-2.2363	0.00580364
D3	RSDel/+	VE59	RT- (5ul)	Cyclo	40	-2.2363	0.00580364
D4	RSDel/+	VE62	RT- (5ul)	Cyclo	35.88	-1.13971	0.0724922	0.00741174	0.103968	0.0712883
D5	RSDel/+	VE62	RT- (5ul)	Cyclo	35.76	-1.10777	0.0780244
D6	RSDel/+	VE62	RT- (5ul)	Cyclo	36.1	-1.19826	0.0633484
D7	RSDel/+	VE64	RT- (5ul)	Cyclo	39.6	-2.12983	0.00741593	0.00190168	0.250083	0.00760419
D8	RSDel/+	VE64	RT- (5ul)	Cyclo	39.18	-2.01805	0.00959299
D9	RSDel/+	VE64	RT- (5ul)	Cyclo	40	-2.2363	0.00580364
D10	RSDel/+	VE66	RT- (5ul)	Cyclo	36.98	-1.43249	0.0369413	0.00526651	0.123172	0.0427572
D11	RSDel/+	VE66	RT- (5ul)	Cyclo	36.69	-1.3553	0.0441265
D12	RSDel/+	VE66	RT- (5ul)	Cyclo	36.58	-1.32602	0.0472038
E1	RSDel/+	VE67	RT- (5ul)	Cyclo	33.34	-0.463655	0.343831	0.0316577	0.0862151	0.367195
E2	RSDel/+	VE67	RT- (5ul)	Cyclo	33.08	-0.394453	0.403224
E3	RSDel/+	VE67	RT- (5ul)	Cyclo	33.29	-0.450347	0.35453
E4	RSDel/+	VE70	RT- (5ul)	Cyclo	40	-2.2363	0.00580364	0	0	0.00580364
E5	RSDel/+	VE70	RT- (5ul)	Cyclo	40	-2.2363	0.00580364
E6	RSDel/+	VE70	RT- (5ul)	Cyclo	40	-2.2363	0.00580364
E7	RSDel/+	VE73	RT- (5ul)	Cyclo	40	-2.2363	0.00580364	0	0	0.00580364
E8	RSDel/+	VE73	RT- (5ul)	Cyclo	40	-2.2363	0.00580364
E9	RSDel/+	VE73	RT- (5ul)	Cyclo	40	-2.2363	0.00580364
E10	RSDel/+	VE74	RT- (5ul)	Cyclo	36.54	-1.31538	0.0483753	0.00766072	0.142351	0.0538159
E11	RSDel/+	VE74	RT- (5ul)	Cyclo	36.47	-1.29674	0.0504958
E12	RSDel/+	VE74	RT- (5ul)	Cyclo	36.12	-1.20359	0.0625766
F1	RSDel/+	VE75	RT- (5ul)	Cyclo	40	-2.2363	0.00580364	0.000725997	0.116667	0.0062228
F2	RSDel/+	VE75	RT- (5ul)	Cyclo	39.68	-2.15113	0.00706111
F3	RSDel/+	VE75	RT- (5ul)	Cyclo	40	-2.2363	0.00580364
F4	+/+	VE80	RT- (5ul)	Cyclo	37.12	-1.46975	0.0339039	0.004885	0.163006	0.0299683
F5	+/+	VE80	RT- (5ul)	Cyclo	37.24	-1.50169	0.0315
F6	+/+	VE80	RT- (5ul)	Cyclo	37.65	-1.61082	0.024501
F7	+/+	VE81	RT- (5ul)	Cyclo	32.72	-0.298635	0.502765	0.0598134	0.136982	0.436652
F8	+/+	VE81	RT- (5ul)	Cyclo	33.01	-0.375822	0.420899
F9	+/+	VE81	RT- (5ul)	Cyclo	33.15	-0.413085	0.386292
F10	+/+	VE82	RT- (5ul)	Cyclo	36.09	-1.1956	0.0637378	0.0139638	0.274126	0.0509392
F11	+/+	VE82	RT- (5ul)	Cyclo	37.02	-1.44313	0.0360467
F12	+/+	VE82	RT- (5ul)	Cyclo	36.39	-1.27545	0.0530332
G1	+/+	VE83	RT- (5ul)	Cyclo	37.84	-1.66139	0.0218078	0.00220216	0.0907322	0.024271
G2	+/+	VE83	RT- (5ul)	Cyclo	37.55	-1.5842	0.0260495
G3	+/+	VE83	RT- (5ul)	Cyclo	37.62	-1.60283	0.0249556
G4	+/+	VE86	RT- (5ul)	Cyclo	34.95	-0.892177	0.128181	0.0207889	0.148716	0.139789
G5	+/+	VE86	RT- (5ul)	Cyclo	34.55	-0.785712	0.16379
G6	+/+	VE86	RT- (5ul)	Cyclo	34.96	-0.894839	0.127397
G7	+/+	VE87	RT- (5ul)	Cyclo	36.89	-1.40853	0.0390361	0.00772973	0.235116	0.0328762
G8	+/+	VE87	RT- (5ul)	Cyclo	37.67	-1.61614	0.0242025
G9	+/+	VE87	RT- (5ul)	Cyclo	37.05	-1.45112	0.03539
G10	+/RSDel	VE78	RT- (5ul)	Cyclo	40	-2.2363	0.00580364	0	0	0.00580364
G11	+/RSDel	VE78	RT- (5ul)	Cyclo	40	-2.2363	0.00580364
G12	+/RSDel	VE78	RT- (5ul)	Cyclo	40	-2.2363	0.00580364
H1	+/RSDel	VE79	RT- (5ul)	Cyclo	40	-2.2363	0.00580364	0	0	0.00580364
H2	+/RSDel	VE79	RT- (5ul)	Cyclo	40	-2.2363	0.00580364
H3	+/RSDel	VE79	RT- (5ul)	Cyclo	40	-2.2363	0.00580364
H4	+/RSDel	VE84	RT- (5ul)	Cyclo	31.23	0.0979479	1.25299	0.0586213	0.046466	1.2616
H5	+/RSDel	VE84	RT- (5ul)	Cyclo	31.29	0.0819781	1.20775
H6	+/RSDel	VE84	RT- (5ul)	Cyclo	31.14	0.121903	1.32404
H7	+/RSDel	VE85	RT- (5ul)	Cyclo	40	-2.2363	0.00580364	0	0	0.00580364
H8	+/RSDel	VE85	RT- (5ul)	Cyclo	40	-2.2363	0.00580364
H9	+/RSDel	VE85	RT- (5ul)	Cyclo	40	-2.2363	0.00580364
H10	+/RSDel	VE88	RT- (5ul)	Cyclo	38.59	-1.86101	0.0137718	0.00460041	0.543803	0.00845969
H11	+/RSDel	VE88	RT- (5ul)	Cyclo	40	-2.2363	0.00580364
H12	+/RSDel	VE88	RT- (5ul)	Cyclo	40	-2.2363	0.00580364
				Slc22a3		y = -3.1298x + 39.004		39.004	-3.1298
				cDNA																Slc22a3
Well	Sample Name			Detector	Ct	log	linear	stdev	cv unnorm	mean	norm	cal	cv	+-stdev	+/+ mean	Sample Name				Mean	STDEV	T-test (type3)
B1	+/+	VE58	cDNA (5ul)	Slc22a3	31.42	2.42316	264.946	44.6566	0.174295	256.214	3.74011	50.7902	0.299083	15.1905	7.36385	+/+	VE58		+/+	100	37.4514
B2	+/+	VE58	cDNA (5ul)	Slc22a3	31.75	2.31772	207.836									+/+	VE58		RSdel/+	76.498	21.4744	0.147041
B3	+/+	VE58	cDNA (5ul)	Slc22a3	31.27	2.47108	295.859									+/+	VE58		+/+	100	23.4593
B4	+/+	VE60	cDNA (5ul)	Slc22a3	31.26	2.47428	298.043	91.5687	0.228469	400.792	4.31685	58.6221	0.246487	14.4496		+/+	VE60		+/RSdel	159.251	57.2174	0.0810173
B5	+/+	VE60	cDNA (5ul)	Slc22a3	30.76	2.63403	430.56									+/+	VE60
B6	+/+	VE60	cDNA (5ul)	Slc22a3	30.63	2.67557	473.773									+/+	VE60
B7	+/+	VE61	cDNA (5ul)	Slc22a3	30.97	2.56694	368.924	12.0543	0.0338857	355.735	6.38567	86.7163	0.159329	13.8165		+/+	VE61
B8	+/+	VE61	cDNA (5ul)	Slc22a3	31.03	2.54777	352.993									+/+	VE61
B9	+/+	VE61	cDNA (5ul)	Slc22a3	31.06	2.53818	345.288									+/+	VE61
B10	+/+	VE63	cDNA (5ul)	Slc22a3	30.01	2.87367	747.594	79.4353	0.116088	684.267	6.39619	86.8593	0.24576	21.3466		+/+	VE63
B11	+/+	VE63	cDNA (5ul)	Slc22a3	30.32	2.77462	595.139									+/+	VE63
B12	+/+	VE63	cDNA (5ul)	Slc22a3	30.08	2.8513	710.069									+/+	VE63
C1	+/+	VE65	cDNA (5ul)	Slc22a3	29.01	3.19318	1560.18	146.816	0.0853072	1721.03	9.34635	126.922	0.212242	26.9382		+/+	VE65
C2	+/+	VE65	cDNA (5ul)	Slc22a3	28.78	3.26666	1847.83									+/+	VE65
C3	+/+	VE65	cDNA (5ul)	Slc22a3	28.85	3.2443	1755.08									+/+	VE65
C4	+/+	VE68	cDNA (5ul)	Slc22a3	29.15	3.14844	1407.49	107.633	0.0776371	1386.36	9.44501	128.262	0.146982	18.8521		+/+	VE68
C5	+/+	VE68	cDNA (5ul)	Slc22a3	29.29	3.10371	1269.73									+/+	VE68
C6	+/+	VE68	cDNA (5ul)	Slc22a3	29.08	3.17081	1481.87									+/+	VE68
C7	+/+	VE69	cDNA (5ul)	Slc22a3	30.78	2.62764	424.272	14.8496	0.0336407	441.418	7.37036	100.088	0.0984346	9.85215		+/+	VE69
C8	+/+	VE69	cDNA (5ul)	Slc22a3	30.7	2.6532	449.992									+/+	VE69
C9	+/+	VE69	cDNA (5ul)	Slc22a3	30.7	2.6532	449.992									+/+	VE69
C10	+/+	VE71	cDNA (5ul)	Slc22a3	28.33	3.41044	2573.01	151.378	0.0615597	2459.05	11.9103	161.74	0.271772	43.9565		+/+	VE71
C11	+/+	VE71	cDNA (5ul)	Slc22a3	28.49	3.35932	2287.28									+/+	VE71
C12	+/+	VE71	cDNA (5ul)	Slc22a3	28.36	3.40086	2516.84									+/+	VE71
D1	RSDel/+	VE59	cDNA (5ul)	Slc22a3	30.2	2.81296	650.069	19.304	0.0304231	634.518	5.17032	70.2122	0.0921196	6.46792		RSDel/+	VE59
D2	RSDel/+	VE59	cDNA (5ul)	Slc22a3	30.22	2.80657	640.574									RSDel/+	VE59
D3	RSDel/+	VE59	cDNA (5ul)	Slc22a3	30.28	2.7874	612.913									RSDel/+	VE59
D4	RSDel/+	VE62	cDNA (5ul)	Slc22a3	30.75	2.63723	433.74	38.0979	0.0928825	410.173	3.96344	53.8229	0.161057	8.66855		RSDel/+	VE62
D5	RSDel/+	VE62	cDNA (5ul)	Slc22a3	30.98	2.56374	366.22									RSDel/+	VE62
D6	RSDel/+	VE62	cDNA (5ul)	Slc22a3	30.76	2.63403	430.56									RSDel/+	VE62
D7	RSDel/+	VE64	cDNA (5ul)	Slc22a3	30.58	2.69155	491.525	77.672	0.134221	578.686	5.94214	80.6933	0.298406	24.0794		RSDel/+	VE64
D8	RSDel/+	VE64	cDNA (5ul)	Slc22a3	30.22	2.80657	640.574									RSDel/+	VE64
D9	RSDel/+	VE64	cDNA (5ul)	Slc22a3	30.3	2.78101	603.96									RSDel/+	VE64
D10	RSDel/+	VE66	cDNA (5ul)	Slc22a3	29.95	2.89284	781.334	52.6281	0.0713165	737.952	9.42159	127.944	0.182606	23.3632		RSDel/+	VE66
D11	RSDel/+	VE66	cDNA (5ul)	Slc22a3	30.14	2.83213	679.407									RSDel/+	VE66
D12	RSDel/+	VE66	cDNA (5ul)	Slc22a3	30	2.87686	753.115									RSDel/+	VE66
E1	RSDel/+	VE67	cDNA (5ul)	Slc22a3	30.66	2.66599	463.431	77.596	0.142128	545.96	4.20776	57.1407	0.247222	14.1265		RSDel/+	VE67
E2	RSDel/+	VE67	cDNA (5ul)	Slc22a3	30.41	2.74586	557.009									RSDel/+	VE67
E3	RSDel/+	VE67	cDNA (5ul)	Slc22a3	30.27	2.79059	617.438									RSDel/+	VE67
E4	RSDel/+	VE70	cDNA (5ul)	Slc22a3	33.93	1.62119	41.8013	10.2622	0.20901	49.099	5.23459	71.0849	0.245685	17.4645		RSDel/+	VE70
E5	RSDel/+	VE70	cDNA (5ul)	Slc22a3	33.42	1.78414	60.833									RSDel/+	VE70
E6	RSDel/+	VE70	cDNA (5ul)	Slc22a3	33.84	1.64995	44.6628									RSDel/+	VE70
E7	RSDel/+	VE73	cDNA (5ul)	Slc22a3	32.22	2.16755	147.079	18.3534	0.112108	163.712	5.49855	74.6695	0.140429	10.4858		RSDel/+	VE73
E8	RSDel/+	VE73	cDNA (5ul)	Slc22a3	31.92	2.2634	183.402									RSDel/+	VE73
E9	RSDel/+	VE73	cDNA (5ul)	Slc22a3	32.1	2.20589	160.654									RSDel/+	VE73
E10	RSDel/+	VE74	cDNA (5ul)	Slc22a3	30.17	2.82254	664.576	55.7794	0.0809273	689.253	6.04647	82.1101	0.2118	17.3909		RSDel/+	VE74
E11	RSDel/+	VE74	cDNA (5ul)	Slc22a3	30.2	2.81296	650.069									RSDel/+	VE74
E12	RSDel/+	VE74	cDNA (5ul)	Slc22a3	30	2.87686	753.115									RSDel/+	VE74
F1	RSDel/+	VE75	cDNA (5ul)	Slc22a3	31.43	2.41996	263.004	26.5107	0.109379	242.375	5.21399	70.8052	0.284222	20.1244		RSDel/+	VE75
F2	RSDel/+	VE75	cDNA (5ul)	Slc22a3	31.72	2.32731	212.474									RSDel/+	VE75
F3	RSDel/+	VE75	cDNA (5ul)	Slc22a3	31.49	2.40079	251.647									RSDel/+	VE75
F4	+/+	VE80	cDNA (5ul)	Slc22a3	30.14	2.83213	679.407	31.9979	0.0452541	707.073	6.55466	73.0508	0.123411	9.01525	8.97273	+/+	VE80
F5	+/+	VE80	cDNA (5ul)	Slc22a3	30.1	2.84491	699.697									+/+	VE80
F6	+/+	VE80	cDNA (5ul)	Slc22a3	30.02	2.87047	742.115									+/+	VE80
F7	+/+	VE81	cDNA (5ul)	Slc22a3	28.55	3.34015	2188.52	116.237	0.0525457	2212.11	10.9308	121.822	0.194991	23.7542		+/+	VE81
F8	+/+	VE81	cDNA (5ul)	Slc22a3	28.46	3.36891	2338.33									+/+	VE81
F9	+/+	VE81	cDNA (5ul)	Slc22a3	28.6	3.32417	2109.47									+/+	VE81
F10	+/+	VE82	cDNA (5ul)	Slc22a3	28.79	3.26347	1834.29	92.2112	0.0524907	1756.72	9.92752	110.641	0.155826	17.2408		+/+	VE82
F11	+/+	VE82	cDNA (5ul)	Slc22a3	28.93	3.21874	1654.76									+/+	VE82
F12	+/+	VE82	cDNA (5ul)	Slc22a3	28.83	3.25069	1781.09									+/+	VE82
G1	+/+	VE83	cDNA (5ul)	Slc22a3	31.23	2.48386	304.695	25.665	0.0792551	323.827	6.34343	70.6967	0.316709	22.3903		+/+	VE83
G2	+/+	VE83	cDNA (5ul)	Slc22a3	31.19	2.49665	313.794									+/+	VE83
G3	+/+	VE83	cDNA (5ul)	Slc22a3	31.03	2.54777	352.993									+/+	VE83
G4	+/+	VE86	cDNA (5ul)	Slc22a3	28.9	3.22832	1691.69	60.0344	0.0350411	1713.26	11.1286	124.026	0.131551	16.3158		+/+	VE86
G5	+/+	VE86	cDNA (5ul)	Slc22a3	28.83	3.25069	1781.09									+/+	VE86
G6	+/+	VE86	cDNA (5ul)	Slc22a3	28.92	3.22193	1666.98									+/+	VE86
G7	+/+	VE87	cDNA (5ul)	Slc22a3	32.36	2.12282	132.684	8.50566	0.0608128	139.866	8.95147	99.7631	0.15537	15.5002		+/+	VE87
G8	+/+	VE87	cDNA (5ul)	Slc22a3	32.2	2.17394	149.259									+/+	VE87
G9	+/+	VE87	cDNA (5ul)	Slc22a3	32.31	2.13879	137.656									+/+	VE87
G10	+/RSDel	VE78	cDNA (5ul)	Slc22a3	29.14	3.15164	1417.88	58.846	0.043562	1350.86	15.4396	172.073	0.229416	39.4763		+/RSDel	VE78
G11	+/RSDel	VE78	cDNA (5ul)	Slc22a3	29.25	3.11649	1307.65									+/RSDel	VE78
G12	+/RSDel	VE78	cDNA (5ul)	Slc22a3	29.23	3.12288	1327.04									+/RSDel	VE78
H1	+/RSDel	VE79	cDNA (5ul)	Slc22a3	32.58	2.05253	112.857	5.1838	0.0479684	108.067	5.84939	65.1907	0.516731	33.6861		+/RSDel	VE79
H2	+/RSDel	VE79	cDNA (5ul)	Slc22a3	32.71	2.01099	102.563									+/RSDel	VE79
H3	+/RSDel	VE79	cDNA (5ul)	Slc22a3	32.63	2.03655	108.781									+/RSDel	VE79
H4	+/RSDel	VE84	cDNA (5ul)	Slc22a3	28.56	3.33695	2172.47	95.7561	0.0419423	2283.04	19.8802	221.562	0.0979537	21.7028		+/RSDel	VE84
H5	+/RSDel	VE84	cDNA (5ul)	Slc22a3	28.46	3.36891	2338.33									+/RSDel	VE84
H6	+/RSDel	VE84	cDNA (5ul)	Slc22a3	28.46	3.36891	2338.33									+/RSDel	VE84
H7	+/RSDel	VE85	cDNA (5ul)	Slc22a3	35.16	1.22819	16.9119	6.12659	0.319611	19.1689	15.4343	172.013	0.344752	59.302		+/RSDel	VE85
H8	+/RSDel	VE85	cDNA (5ul)	Slc22a3	35.37	1.1611	14.4909									+/RSDel	VE85
H9	+/RSDel	VE85	cDNA (5ul)	Slc22a3	34.57	1.4167	26.1038									+/RSDel	VE85
H10	+/RSDel	VE88	cDNA (5ul)	Slc22a3	27.93	3.53825	3453.39	272.806	0.0869259	3138.38	14.8424	165.417	0.471113	77.9302		+/RSDel	VE88
H11	+/RSDel	VE88	cDNA (5ul)	Slc22a3	28.13	3.47434	2980.87									+/RSDel	VE88
H12	+/RSDel	VE88	cDNA (5ul)	Slc22a3	28.13	3.47434	2980.87									+/RSDel	VE88
				Air Middle		y = -3.3048x + 39.234		39.234	-3.3048
				cDNA																Air Middle
Well	Sample Name			Detector	Ct	log	linear	stdev	cv unnorm	mean	norm	cal	cv	+-stdev	+/+ mean	Sample Name				Mean	STDEV	T-test (type3)
B1	+/+	VE58	cDNA (5ul)	Air Middle	31.09	2.46429	291.269	10.7657	0.0355153	303.128	4.42495	168.201	0.245628	41.3148	2.63076	+/+	VE58		+/+	100	32.6968
B2	+/+	VE58	cDNA (5ul)	Air Middle	30.99	2.49455	312.287									+/+	VE58		RSdel/+	142.031	39.7952	0.03056
B3	+/+	VE58	cDNA (5ul)	Air Middle	31.02	2.48548	305.827									+/+	VE58		+/+	100	51.1429
B4	+/+	VE60	cDNA (5ul)	Air Middle	31.68	2.28577	193.093	18.7974	0.101146	185.844	2.00169	76.0879	0.13707	10.4294		+/+	VE60		+/RSdel	8.47234	12.0709	0.0061754
B5	+/+	VE60	cDNA (5ul)	Air Middle	31.91	2.21617	164.502									+/+	VE60
B6	+/+	VE60	cDNA (5ul)	Air Middle	31.63	2.3009	199.938									+/+	VE60
B7	+/+	VE61	cDNA (5ul)	Air Middle	33.01	1.88332	76.4401	30.3479	0.275597	110.117	1.97666	75.1367	0.31653	23.783		+/+	VE61
B8	+/+	VE61	cDNA (5ul)	Air Middle	32.19	2.13145	135.346									+/+	VE61
B9	+/+	VE61	cDNA (5ul)	Air Middle	32.38	2.07395	118.564									+/+	VE61
B10	+/+	VE63	cDNA (5ul)	Air Middle	31.28	2.4068	255.154	31.9356	0.128858	247.836	2.31665	88.0603	0.252043	22.195		+/+	VE63
B11	+/+	VE63	cDNA (5ul)	Air Middle	31.54	2.32813	212.877									+/+	VE63
B12	+/+	VE63	cDNA (5ul)	Air Middle	31.17	2.44009	275.478									+/+	VE63
C1	+/+	VE65	cDNA (5ul)	Air Middle	30.03	2.78504	609.593	110.313	0.174647	631.636	3.4302	130.389	0.261287	34.0689		+/+	VE65
C2	+/+	VE65	cDNA (5ul)	Air Middle	30.22	2.72755	534.008									+/+	VE65
C3	+/+	VE65	cDNA (5ul)	Air Middle	29.73	2.87582	751.306									+/+	VE65
C4	+/+	VE68	cDNA (5ul)	Air Middle	30.9	2.52179	332.496	9.52996	0.0278669	341.981	2.32985	88.562	0.127877	11.3251		+/+	VE68
C5	+/+	VE68	cDNA (5ul)	Air Middle	30.86	2.53389	341.893									+/+	VE68
C6	+/+	VE68	cDNA (5ul)	Air Middle	30.82	2.54599	351.555									+/+	VE68
C7	+/+	VE69	cDNA (5ul)	Air Middle	32.39	2.07093	117.741	7.87447	0.0625868	125.817	2.10076	79.854	0.111691	8.91893		+/+	VE69
C8	+/+	VE69	cDNA (5ul)	Air Middle	32.21	2.12539	133.473									+/+	VE69
C9	+/+	VE69	cDNA (5ul)	Air Middle	32.29	2.10119	126.237									+/+	VE69
C10	+/+	VE71	cDNA (5ul)	Air Middle	30.43	2.664	461.322	66.2455	0.130151	508.991	2.46528	93.71	0.294974	27.642		+/+	VE71
C11	+/+	VE71	cDNA (5ul)	Air Middle	30.37	2.68216	481.016									+/+	VE71
C12	+/+	VE71	cDNA (5ul)	Air Middle	30.09	2.76688	584.635									+/+	VE71
D1	RSDel/+	VE59	cDNA (5ul)	Air Middle	30.76	2.56415	366.563	79.5894	0.187225	425.101	3.4639	131.669	0.206431	27.1806		RSDel/+	VE59
D2	RSDel/+	VE59	cDNA (5ul)	Air Middle	30.66	2.59441	393.014									RSDel/+	VE59
D3	RSDel/+	VE59	cDNA (5ul)	Air Middle	30.27	2.71242	515.725									RSDel/+	VE59
D4	RSDel/+	VE62	cDNA (5ul)	Air Middle	31.33	2.39167	246.418	32.3301	0.141953	227.752	2.20073	83.654	0.193553	16.1915		RSDel/+	VE62
D5	RSDel/+	VE62	cDNA (5ul)	Air Middle	31.33	2.39167	246.418									RSDel/+	VE62
D6	RSDel/+	VE62	cDNA (5ul)	Air Middle	31.7	2.27971	190.421									RSDel/+	VE62
D7	RSDel/+	VE64	cDNA (5ul)	Air Middle	31.23	2.42193	264.199	12.8013	0.0496654	257.751	2.64667	100.605	0.271104	27.2745		RSDel/+	VE64
D8	RSDel/+	VE64	cDNA (5ul)	Air Middle	31.35	2.38562	243.008									RSDel/+	VE64
D9	RSDel/+	VE64	cDNA (5ul)	Air Middle	31.22	2.42496	266.047									RSDel/+	VE64
D10	RSDel/+	VE66	cDNA (5ul)	Air Middle	30.85	2.53692	344.283	31.2445	0.0974338	320.674	4.09412	155.625	0.194299	30.2379		RSDel/+	VE66
D11	RSDel/+	VE66	cDNA (5ul)	Air Middle	30.9	2.52179	332.496									RSDel/+	VE66
D12	RSDel/+	VE66	cDNA (5ul)	Air Middle	31.12	2.45522	285.244									RSDel/+	VE66
E1	RSDel/+	VE67	cDNA (5ul)	Air Middle	30.25	2.71847	522.962	74.7171	0.125664	594.579	4.58247	174.188	0.238138	41.4809		RSDel/+	VE67
E2	RSDel/+	VE67	cDNA (5ul)	Air Middle	29.89	2.8274	672.052									RSDel/+	VE67
E3	RSDel/+	VE67	cDNA (5ul)	Air Middle	30.08	2.76991	588.722									RSDel/+	VE67
E4	RSDel/+	VE70	cDNA (5ul)	Air Middle	33.2	1.82583	66.9621	12.855	0.24663	52.1227	5.55695	211.23	0.278393	58.805		RSDel/+	VE70
E5	RSDel/+	VE70	cDNA (5ul)	Air Middle	33.79	1.6473	44.3916									RSDel/+	VE70
E6	RSDel/+	VE70	cDNA (5ul)	Air Middle	33.77	1.65335	45.0145									RSDel/+	VE70
E7	RSDel/+	VE73	cDNA (5ul)	Air Middle	32.63	1.99831	99.6106	8.56851	0.0936786	91.467	3.07209	116.776	0.126206	14.7378		RSDel/+	VE73
E8	RSDel/+	VE73	cDNA (5ul)	Air Middle	32.9	1.91661	82.5289									RSDel/+	VE73
E9	RSDel/+	VE73	cDNA (5ul)	Air Middle	32.74	1.96502	92.2615									RSDel/+	VE73
E10	RSDel/+	VE74	cDNA (5ul)	Air Middle	30.56	2.62467	421.373	20.5608	0.0507155	405.414	3.55649	135.189	0.202193	27.3343		RSDel/+	VE74
E11	RSDel/+	VE74	cDNA (5ul)	Air Middle	30.59	2.61559	412.657									RSDel/+	VE74
E12	RSDel/+	VE74	cDNA (5ul)	Air Middle	30.7	2.5823	382.212									RSDel/+	VE74
F1	RSDel/+	VE75	cDNA (5ul)	Air Middle	31.61	2.30695	202.744	6.3403	0.0306161	207.09	4.45494	169.341	0.264113	44.7251		RSDel/+	VE75
F2	RSDel/+	VE75	cDNA (5ul)	Air Middle	31.53	2.33115	214.365									RSDel/+	VE75
F3	RSDel/+	VE75	cDNA (5ul)	Air Middle	31.6	2.30997	204.161									RSDel/+	VE75
F4	+/+	VE80	cDNA (5ul)	Air Middle	32.79	1.94989	89.1027	13.7703	0.181879	75.7113	0.701854	42.3009	0.215086	9.09834	1.65919	+/+	VE80
F5	+/+	VE80	cDNA (5ul)	Air Middle	33.32	1.78952	61.5911									+/+	VE80
F6	+/+	VE80	cDNA (5ul)	Air Middle	33.01	1.88332	76.4401									+/+	VE80
F7	+/+	VE81	cDNA (5ul)	Air Middle	30.41	2.67006	467.795	20.1475	0.0452962	444.793	2.19788	132.467	0.193164	25.5877		+/+	VE81
F8	+/+	VE81	cDNA (5ul)	Air Middle	30.53	2.63374	430.274									+/+	VE81
F9	+/+	VE81	cDNA (5ul)	Air Middle	30.51	2.6398	436.311									+/+	VE81
F10	+/+	VE82	cDNA (5ul)	Air Middle	30.95	2.50666	321.112	11.111	0.0359796	308.813	1.74516	105.181	0.151067	15.8894		+/+	VE82
F11	+/+	VE82	cDNA (5ul)	Air Middle	31.05	2.4764	299.501									+/+	VE82
F12	+/+	VE82	cDNA (5ul)	Air Middle	31.02	2.48548	305.827									+/+	VE82
G1	+/+	VE83	cDNA (5ul)	Air Middle	34.27	1.50206	31.773	4.63833	0.174074	26.6458	0.521962	31.4588	0.352598	11.0923		+/+	VE83
G2	+/+	VE83	cDNA (5ul)	Air Middle	34.75	1.35681	22.7412									+/+	VE83
G3	+/+	VE83	cDNA (5ul)	Air Middle	34.59	1.40523	25.4231									+/+	VE83
G4	+/+	VE86	cDNA (5ul)	Air Middle	30.56	2.62467	421.373	37.7613	0.0991657	380.79	2.47344	149.075	0.160971	23.9968		+/+	VE86
G5	+/+	VE86	cDNA (5ul)	Air Middle	30.73	2.57323	374.306									+/+	VE86
G6	+/+	VE86	cDNA (5ul)	Air Middle	30.84	2.53994	346.69									+/+	VE86
G7	+/+	VE87	cDNA (5ul)	Air Middle	33.84	1.63217	42.8718	5.99125	0.165643	36.1696	2.31486	139.517	0.218814	30.5283		+/+	VE87
G8	+/+	VE87	cDNA (5ul)	Air Middle	34.16	1.53534	34.3038									+/+	VE87
G9	+/+	VE87	cDNA (5ul)	Air Middle	34.29	1.49601	31.3333									+/+	VE87
G10	+/RSDel	VE78	cDNA (5ul)	Air Middle	40	-0.231784	0.58643	0.265102	0.358495	0.739487	0.00845196	0.509402	0.423383	0.215672		+/RSDel	VE78
G11	+/RSDel	VE78	cDNA (5ul)	Air Middle	40	-0.231784	0.58643									+/RSDel	VE78
G12	+/RSDel	VE78	cDNA (5ul)	Air Middle	39.17	0.0193658	1.0456									+/RSDel	VE78
H1	+/RSDel	VE79	cDNA (5ul)	Air Middle	40	-0.231784	0.58643	0	0	0.58643	0.031742	1.9131	0.5145	0.984289		+/RSDel	VE79
H2	+/RSDel	VE79	cDNA (5ul)	Air Middle	40	-0.231784	0.58643									+/RSDel	VE79
H3	+/RSDel	VE79	cDNA (5ul)	Air Middle	40	-0.231784	0.58643									+/RSDel	VE79
H4	+/RSDel	VE84	cDNA (5ul)	Air Middle	35.25	1.20552	16.0516	4.76825	0.221267	21.5497	0.18765	11.3097	0.238317	2.69529		+/RSDel	VE84
H5	+/RSDel	VE84	cDNA (5ul)	Air Middle	34.67	1.38102	24.0448									+/RSDel	VE84
H6	+/RSDel	VE84	cDNA (5ul)	Air Middle	34.64	1.3901	24.5527									+/RSDel	VE84
H7	+/RSDel	VE85	cDNA (5ul)	Air Middle	40	-0.231784	0.58643	0	0	0.58643	0.472178	28.4583	0.12924	3.67796		+/RSDel	VE85
H8	+/RSDel	VE85	cDNA (5ul)	Air Middle	40	-0.231784	0.58643									+/RSDel	VE85
H9	+/RSDel	VE85	cDNA (5ul)	Air Middle	40	-0.231784	0.58643									+/RSDel	VE85
H10	+/RSDel	VE88	cDNA (5ul)	Air Middle	40	-0.231784	0.58643	0.0244311	0.0406822	0.600535	0.00284013	0.171176	0.464808	0.0795638		+/RSDel	VE88
H11	+/RSDel	VE88	cDNA (5ul)	Air Middle	40	-0.231784	0.58643									+/RSDel	VE88
H12	+/RSDel	VE88	cDNA (5ul)	Air Middle	39.9	-0.201525	0.628746									+/RSDel	VE88
				Tcp1		y = -3.2361x + 32.967		32.967	-3.2361
				cDNA																Tcp1
Well	Sample Name			Detector	Ct	log	linear	stdev	cv unnorm	mean	norm	cal	cv	+-stdev	+/+ mean	Sample Name				Mean	STDEV	T-test (type3)
B1	+/+	VE58	cDNA (5ul)	Tcp1	24.55	2.60097	398.998	12.8547	0.032436	396.309	5.78517	85.0769	0.245202	20.861	6.79993	+/+	VE58		+/+	100	16.4462
B2	+/+	VE58	cDNA (5ul)	Tcp1	24.61	2.58243	382.322									+/+	VE58		RSdel/+	43.7609	12.8164	2.66405e-06
B3	+/+	VE58	cDNA (5ul)	Tcp1	24.52	2.61024	407.606									+/+	VE58		+/+	100	25.8412
B4	+/+	VE60	cDNA (5ul)	Tcp1	24.29	2.68131	480.08	41.3166	0.0799825	516.571	5.56387	81.8225	0.12229	10.0061		+/+	VE60		+/RSdel	39.398	20.7593	0.00195592
B5	+/+	VE60	cDNA (5ul)	Tcp1	24.21	2.70604	508.2									+/+	VE60
B6	+/+	VE60	cDNA (5ul)	Tcp1	24.07	2.7493	561.432									+/+	VE60
B7	+/+	VE61	cDNA (5ul)	Tcp1	24.64	2.57316	374.248	46.9127	0.121537	385.995	6.92885	101.896	0.197507	20.1251		+/+	VE61
B8	+/+	VE61	cDNA (5ul)	Tcp1	24.75	2.53917	346.073									+/+	VE61
B9	+/+	VE61	cDNA (5ul)	Tcp1	24.42	2.64114	437.665									+/+	VE61
B10	+/+	VE63	cDNA (5ul)	Tcp1	23.61	2.89144	778.831	18.2204	0.0230053	792.008	7.4033	108.873	0.217832	23.7161		+/+	VE63
B11	+/+	VE63	cDNA (5ul)	Tcp1	23.6	2.89453	784.393									+/+	VE63
B12	+/+	VE63	cDNA (5ul)	Tcp1	23.55	2.90998	812.801									+/+	VE63
C1	+/+	VE65	cDNA (5ul)	Tcp1	22.94	3.09848	1254.53	151.861	0.13511	1123.98	6.10397	89.7652	0.236695	21.2469		+/+	VE65
C2	+/+	VE65	cDNA (5ul)	Tcp1	23.32	2.98106	957.321									+/+	VE65
C3	+/+	VE65	cDNA (5ul)	Tcp1	23.05	3.06449	1160.09									+/+	VE65
C4	+/+	VE68	cDNA (5ul)	Tcp1	23.05	3.06449	1160.09	226.85	0.250592	905.256	6.16732	90.6969	0.279951	25.3907		+/+	VE68
C5	+/+	VE68	cDNA (5ul)	Tcp1	23.71	2.86054	725.341									+/+	VE68
C6	+/+	VE68	cDNA (5ul)	Tcp1	23.52	2.91925	830.338									+/+	VE68
C7	+/+	VE69	cDNA (5ul)	Tcp1	24.22	2.70294	504.597	30.8071	0.0578847	532.215	8.88638	130.683	0.109125	14.2609		+/+	VE69
C8	+/+	VE69	cDNA (5ul)	Tcp1	24.16	2.72149	526.606									+/+	VE69
C9	+/+	VE69	cDNA (5ul)	Tcp1	24.06	2.75239	565.441									+/+	VE69
C10	+/+	VE71	cDNA (5ul)	Tcp1	23.45	2.94089	872.742	646.082	0.413895	1560.98	7.56056	111.186	0.491304	54.6261		+/+	VE71
C11	+/+	VE71	cDNA (5ul)	Tcp1	22.55	3.219	1655.76									+/+	VE71
C12	+/+	VE71	cDNA (5ul)	Tcp1	22.18	3.33333	2154.43									+/+	VE71
D1	RSDel/+	VE59	cDNA (5ul)	Tcp1	24.65	2.57007	371.594	92.0045	0.34634	265.648	2.16461	31.8328	0.357088	11.3671		RSDel/+	VE59
D2	RSDel/+	VE59	cDNA (5ul)	Tcp1	25.48	2.31359	205.867									RSDel/+	VE59
D3	RSDel/+	VE59	cDNA (5ul)	Tcp1	25.39	2.3414	219.482									RSDel/+	VE59
D4	RSDel/+	VE62	cDNA (5ul)	Tcp1	25.21	2.39702	249.472	15.7148	0.0648714	242.245	2.34078	34.4235	0.146699	5.04989		RSDel/+	VE62
D5	RSDel/+	VE62	cDNA (5ul)	Tcp1	25.19	2.4032	253.047									RSDel/+	VE62
D6	RSDel/+	VE62	cDNA (5ul)	Tcp1	25.36	2.35067	224.217									RSDel/+	VE62
D7	RSDel/+	VE64	cDNA (5ul)	Tcp1	25.61	2.27342	187.679	46.6845	0.193567	241.18	2.47651	36.4196	0.329392	11.9963		RSDel/+	VE64
D8	RSDel/+	VE64	cDNA (5ul)	Tcp1	25.14	2.41865	262.212									RSDel/+	VE64
D9	RSDel/+	VE64	cDNA (5ul)	Tcp1	25.08	2.43719	273.648									RSDel/+	VE64
D10	RSDel/+	VE66	cDNA (5ul)	Tcp1	25.14	2.41865	262.212	27.1787	0.0951123	285.754	3.64828	53.6518	0.193145	10.3626		RSDel/+	VE66
D11	RSDel/+	VE66	cDNA (5ul)	Tcp1	25.05	2.44646	279.552									RSDel/+	VE66
D12	RSDel/+	VE66	cDNA (5ul)	Tcp1	24.88	2.499	315.497									RSDel/+	VE66
E1	RSDel/+	VE67	cDNA (5ul)	Tcp1	24.38	2.6535	450.301	33.4614	0.0757641	441.653	3.40386	50.0572	0.216006	10.8127		RSDel/+	VE67
E2	RSDel/+	VE67	cDNA (5ul)	Tcp1	24.32	2.67204	469.941									RSDel/+	VE67
E3	RSDel/+	VE67	cDNA (5ul)	Tcp1	24.53	2.60715	404.716									RSDel/+	VE67
E4	RSDel/+	VE70	cDNA (5ul)	Tcp1	31.42	0.478045	3.00638	11.3188	0.70981	15.9463	1.70008	25.0014	0.721462	18.0375		RSDel/+	VE70
E5	RSDel/+	VE70	cDNA (5ul)	Tcp1	28.5	1.38037	24.0085									RSDel/+	VE70
E6	RSDel/+	VE70	cDNA (5ul)	Tcp1	28.7	1.31856	20.8239									RSDel/+	VE70
E7	RSDel/+	VE73	cDNA (5ul)	Tcp1	26.49	2.00148	100.342	8.49297	0.09084	93.4937	3.14016	46.1793	0.124113	5.73146		RSDel/+	VE73
E8	RSDel/+	VE73	cDNA (5ul)	Tcp1	26.74	1.92423	83.9904									RSDel/+	VE73
E9	RSDel/+	VE73	cDNA (5ul)	Tcp1	26.55	1.98294	96.1485									RSDel/+	VE73
E10	RSDel/+	VE74	cDNA (5ul)	Tcp1	24.24	2.69676	497.467	30.0696	0.0588223	511.195	4.48445	65.9485	0.204377	13.4784		RSDel/+	VE74
E11	RSDel/+	VE74	cDNA (5ul)	Tcp1	24.26	2.69058	490.438									RSDel/+	VE74
E12	RSDel/+	VE74	cDNA (5ul)	Tcp1	24.11	2.73694	545.678									RSDel/+	VE74
F1	RSDel/+	VE75	cDNA (5ul)	Tcp1	25.78	2.22088	166.297	7.97377	0.0501169	159.103	3.42264	50.3335	0.267077	13.4429		RSDel/+	VE75
F2	RSDel/+	VE75	cDNA (5ul)	Tcp1	25.83	2.20543	160.484									RSDel/+	VE75
F3	RSDel/+	VE75	cDNA (5ul)	Tcp1	25.92	2.17762	150.529									RSDel/+	VE75
F4	+/+	VE80	cDNA (5ul)	Tcp1	24.21	2.70604	508.2	11.0831	0.0213447	519.244	4.81346	81.1293	0.116781	9.47437	5.93307	+/+	VE80
F5	+/+	VE80	cDNA (5ul)	Tcp1	24.18	2.71531	519.165									+/+	VE80
F6	+/+	VE80	cDNA (5ul)	Tcp1	24.15	2.72458	530.366									+/+	VE80
F7	+/+	VE81	cDNA (5ul)	Tcp1	22.8	3.14174	1385.94	58.4567	0.0407784	1433.52	7.08351	119.39	0.192154	22.9414		+/+	VE81
F8	+/+	VE81	cDNA (5ul)	Tcp1	22.69	3.17574	1498.77									+/+	VE81
F9	+/+	VE81	cDNA (5ul)	Tcp1	22.77	3.15102	1415.84									+/+	VE81
F10	+/+	VE82	cDNA (5ul)	Tcp1	23.1	3.04904	1119.54	233.683	0.173372	1347.87	7.61705	128.383	0.227122	29.1586		+/+	VE82
F11	+/+	VE82	cDNA (5ul)	Tcp1	22.85	3.12629	1337.5									+/+	VE82
F12	+/+	VE82	cDNA (5ul)	Tcp1	22.61	3.20046	1586.56									+/+	VE82
G1	+/+	VE83	cDNA (5ul)	Tcp1	26.11	2.11891	131.495	90.1682	0.382741	235.585	4.61486	77.782	0.490423	38.146		+/+	VE83
G2	+/+	VE83	cDNA (5ul)	Tcp1	25.02	2.45573	285.584									+/+	VE83
G3	+/+	VE83	cDNA (5ul)	Tcp1	25	2.46191	289.677									+/+	VE83
G4	+/+	VE86	cDNA (5ul)	Tcp1	23.14	3.03668	1088.13	24.1412	0.0216626	1114.42	7.23878	122.007	0.128635	15.6945		+/+	VE86
G5	+/+	VE86	cDNA (5ul)	Tcp1	23.08	3.05522	1135.59									+/+	VE86
G6	+/+	VE86	cDNA (5ul)	Tcp1	23.1	3.04904	1119.54									+/+	VE86
G7	+/+	VE87	cDNA (5ul)	Tcp1	27.37	1.72955	53.6477	10.8013	0.163395	66.1058	4.23078	71.3085	0.217117	15.4822		+/+	VE87
G8	+/+	VE87	cDNA (5ul)	Tcp1	26.96	1.85625	71.8202									+/+	VE87
G9	+/+	VE87	cDNA (5ul)	Tcp1	26.94	1.86243	72.8496									+/+	VE87
G10	+/RSDel	VE78	cDNA (5ul)	Tcp1	24.93	2.48355	304.47	38.9572	0.133647	291.492	3.33161	56.1532	0.261908	14.707		+/RSDel	VE78
G11	+/RSDel	VE78	cDNA (5ul)	Tcp1	25.22	2.39393	247.703									+/RSDel	VE78
G12	+/RSDel	VE78	cDNA (5ul)	Tcp1	24.85	2.50827	322.304									+/RSDel	VE78
H1	+/RSDel	VE79	cDNA (5ul)	Tcp1	28.02	1.52869	33.7825	14.173	0.584301	24.2564	1.31294	22.1291	0.778535	17.2283		+/RSDel	VE79
H2	+/RSDel	VE79	cDNA (5ul)	Tcp1	30.05	0.901394	7.96881									+/RSDel	VE79
H3	+/RSDel	VE79	cDNA (5ul)	Tcp1	28.14	1.49161	31.0177									+/RSDel	VE79
H4	+/RSDel	VE84	cDNA (5ul)	Tcp1	24.22	2.70294	504.597	147.606	0.36085	409.05	3.56191	60.0349	0.371549	22.3059		+/RSDel	VE84
H5	+/RSDel	VE84	cDNA (5ul)	Tcp1	24.28	2.6844	483.508									+/RSDel	VE84
H6	+/RSDel	VE84	cDNA (5ul)	Tcp1	25.27	2.37848	239.045									+/RSDel	VE84
H7	+/RSDel	VE85	cDNA (5ul)	Tcp1	35.16	-0.677668	0.210055	0.667651	0.682976	0.977561	0.787107	13.2664	0.695097	9.22145		+/RSDel	VE85
H8	+/RSDel	VE85	cDNA (5ul)	Tcp1	32.6	0.113408	1.2984									+/RSDel	VE85
H9	+/RSDel	VE85	cDNA (5ul)	Tcp1	32.47	0.15358	1.42423									+/RSDel	VE85
H10	+/RSDel	VE88	cDNA (5ul)	Tcp1	24.05	2.75548	569.478	16.2108	0.0284584	569.632	2.69398	45.4062	0.463898	21.0638		+/RSDel	VE88
H11	+/RSDel	VE88	cDNA (5ul)	Tcp1	24.09	2.74312	553.499									+/RSDel	VE88
H12	+/RSDel	VE88	cDNA (5ul)	Tcp1	24.01	2.76784	585.919									+/RSDel	VE88

## Sheet: Figure
Figure 1D, Left Panel: RT-qPCR expression analysis of the RSDel maternal deletion (red, RSDel/+) and paternal deletion (blue, +/RSDel) in E9.5 VYS endoderm
			Airn						Tcp1						Slc22a3
		RSDel/+			+/RSDel			RSDel/+			+/RSDel			RSDel/+			+/RSDel
Genotype	Sample Name	Normalised expression	Genotype	Sample Name	Normalised expression	Genotype	Sample Name	Normalised expression	Genotype	Sample Name	Normalised expression	Genotype	Sample Name	Normalised expression	Genotype	Sample Name	Normalised expression
RSDel/+	VE59	131.669	+/RSDel	VE78	0.509402	RSDel/+	VE59	31.8328	+/RSDel	VE78	56.1532	RSDel/+	VE59	70.2122	+/RSDel	VE78	172.073
RSDel/+	VE62	83.654	+/RSDel	VE79	1.9131	RSDel/+	VE62	34.4235	+/RSDel	VE79	22.1291	RSDel/+	VE62	53.8229	+/RSDel	VE79	65.1907
RSDel/+	VE64	100.605	+/RSDel	VE84	11.3097	RSDel/+	VE64	36.4196	+/RSDel	VE84	60.0349	RSDel/+	VE64	80.6933	+/RSDel	VE84	221.562
RSDel/+	VE66	155.625	+/RSDel	VE85	28.4583	RSDel/+	VE66	53.6518	+/RSDel	VE85	13.2664	RSDel/+	VE66	127.944	+/RSDel	VE85	172.013
RSDel/+	VE67	174.188	+/RSDel	VE88	0.171176	RSDel/+	VE67	50.0572	+/RSDel	VE88	45.4062	RSDel/+	VE67	57.1407	+/RSDel	VE88	165.417
RSDel/+	VE70	211.23				RSDel/+	VE70	25.0014				RSDel/+	VE70	71.0849
RSDel/+	VE73	116.776	+/RSDel	Mean	8.47234	RSDel/+	VE73	46.1793	+/RSDel	Mean	39.398	RSDel/+	VE73	74.6695	+/RSDel	Mean	159.251
RSDel/+	VE74	135.189				RSDel/+	VE74	65.9485				RSDel/+	VE74	82.1101
RSDel/+	VE75	169.341				RSDel/+	VE75	50.3335				RSDel/+	VE75	70.8052
RSDel/+	Mean	142.031				RSDel/+	Mean	43.7609				RSDel/+	Mean	76.498
		Note: Values plotted in the figure are highlighted
		(Values copied from analysis sheet)
